# Supplementary material for: Novel Derivatives of Quinoxaline-2-carboxylic Acid 1,4-Dioxides as Antimycobacterial Agents: Mechanistic Studies and Therapeutic Potential
Source: MDPI journal article supplement (doi:10.3390/ph16111565), 2023-11-06
Supplement: s1 [file s1]

## Supplementary Materials

### Legends to Figures and Tables

|                                                                                                                                                          |            |
|----------------------------------------------------------------------------------------------------------------------------------------------------------|------------|
| <b>Figure S1-S16.</b> $^1\text{H}$ and $^{13}\text{C}$ NMR spectra of the compounds <b>4-9</b> .                                                         | <b>S2</b>  |
| <b>Figure S17-S20.</b> Copies of HRMS ESI spectra of the compounds <b>4-7</b> .                                                                          | <b>S10</b> |
| <b>Figure S21-S24.</b> Copies of HPLC spectra of the compounds <b>4-7</b> .                                                                              | <b>S14</b> |
| <b>Figure S25-S28.</b> Copies of IR spectra of the compounds <b>4-7</b> .                                                                                | <b>S18</b> |
| <b>Figure S29-S38.</b> Copies of 2D NMR spectra of <b>4</b> and <b>7</b> .                                                                               | <b>S22</b> |
| <b>Table S1.</b> Increments ( $I^C$ ) for the $^{13}\text{C}$ chemical shift differences for the piperazine group for regioisomers <b>4</b> and <b>7</b> | <b>S32</b> |
| <b>Table S2.</b> Stability of aqueous solutions of derivatives <b>4-7</b>                                                                                | <b>S33</b> |
| <b>Figure S39.</b> Nucleotide sequence of <i>MSMEG_4883</i> .                                                                                            | <b>S34</b> |
| <b>Table S3.</b> Unique SNPs in quinoxaline-resistant <i>M. smegmatis</i> mutants                                                                        | <b>S35</b> |
| <b>Table S4.</b> Results of Dunnett's multiple comparison test for <i>in vivo</i> testing of compound <b>4</b> .                                         | <b>S41</b> |
| <b>Figure S40.</b> Results of MTT test of compounds on human fibroblasts.                                                                                | <b>S42</b> |

## Copies of NMR Spectra

**Figure S1.** Copy of  $^1\text{H}$  NMR spectrum of the derivative **2**.

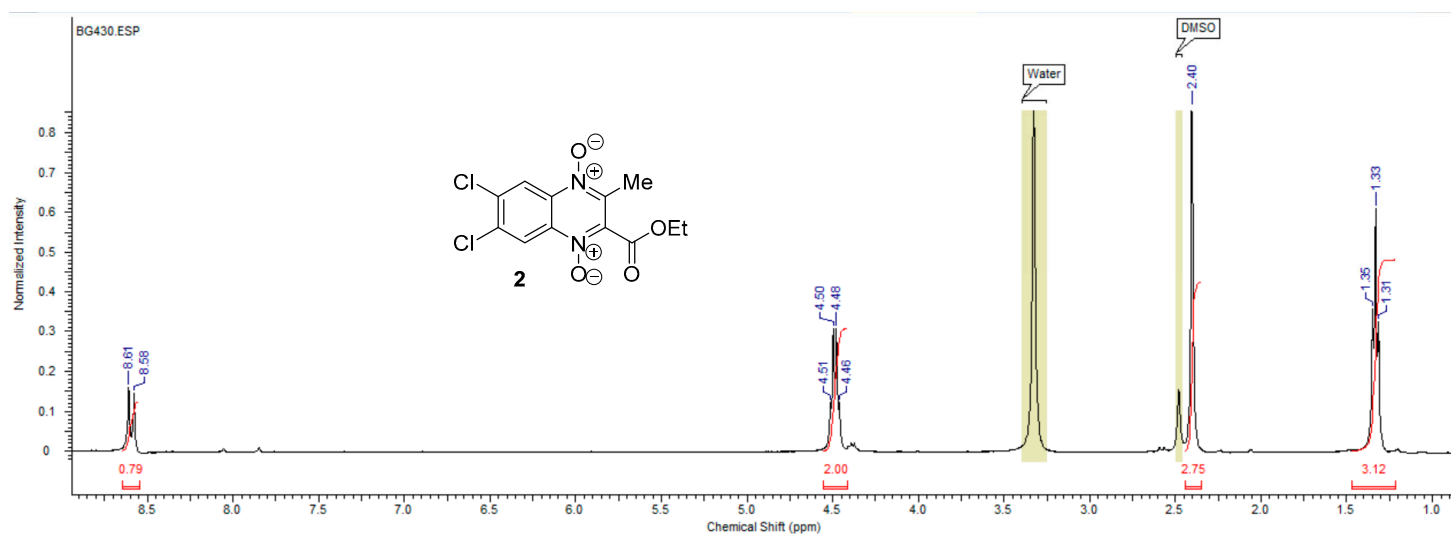

**Figure S2.** Copy of  $^{13}\text{C}$  NMR spectrum of the derivative **2**.

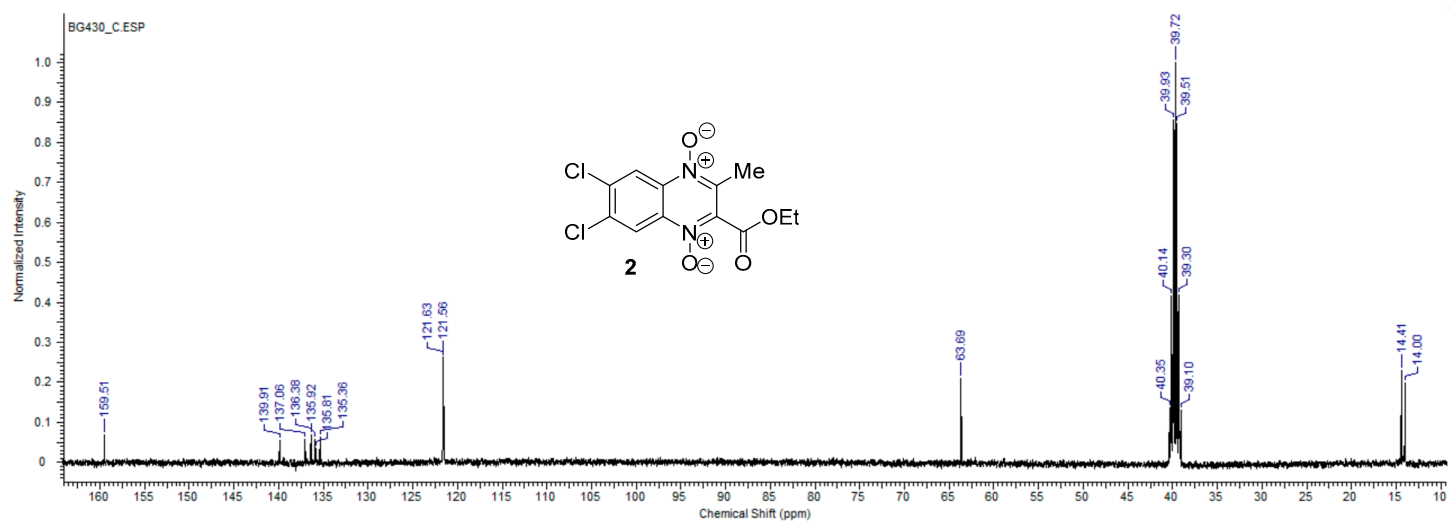

**Figure S3.** Copy of  $^1\text{H}$  NMR spectrum of the derivative **3**.

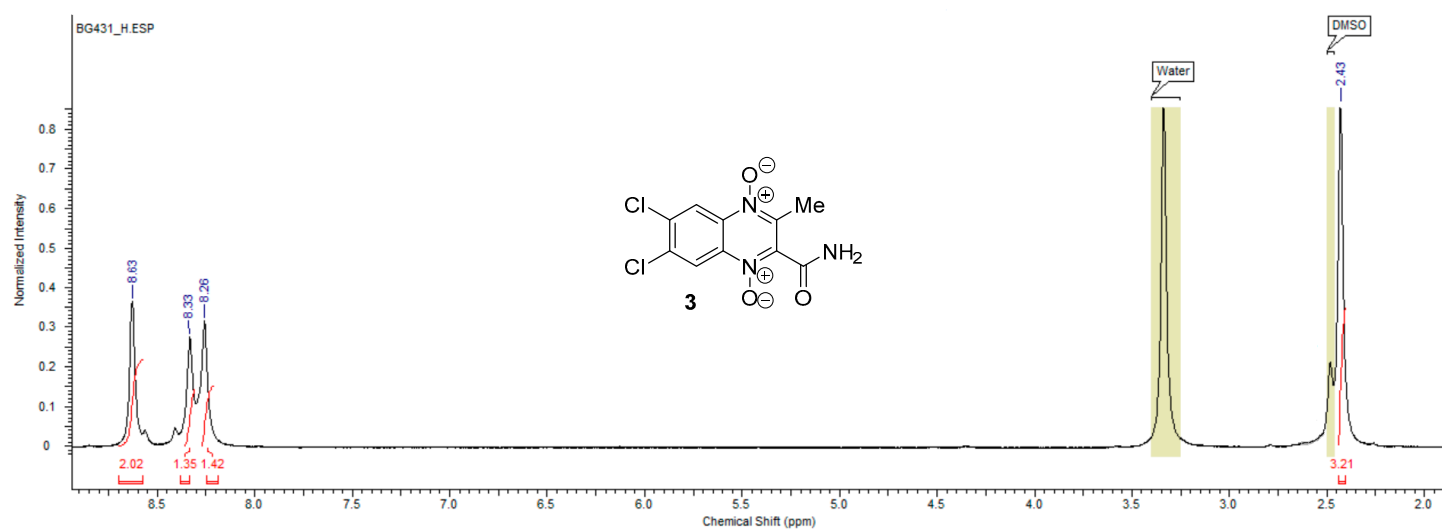

**Figure S4.** Copy of  $^{13}\text{C}$  NMR spectrum of the derivative **3**.

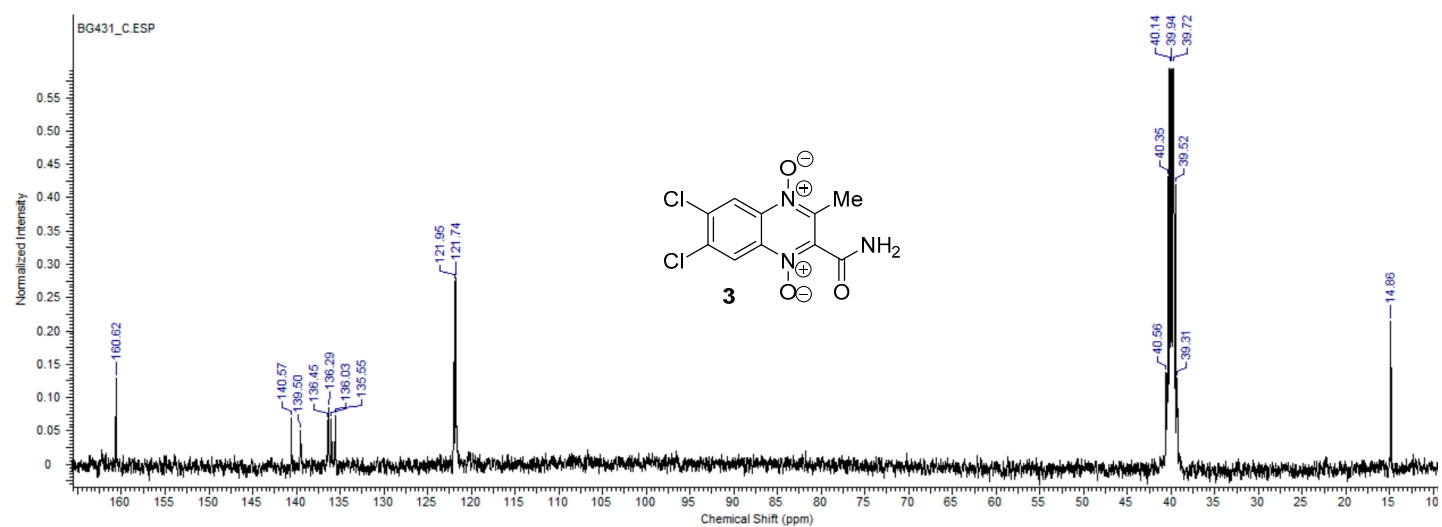

**Figure S5.** Copy of  $^1\text{H}$  NMR spectrum of the derivative **4**.

BG-127 DMSO- $d_6$

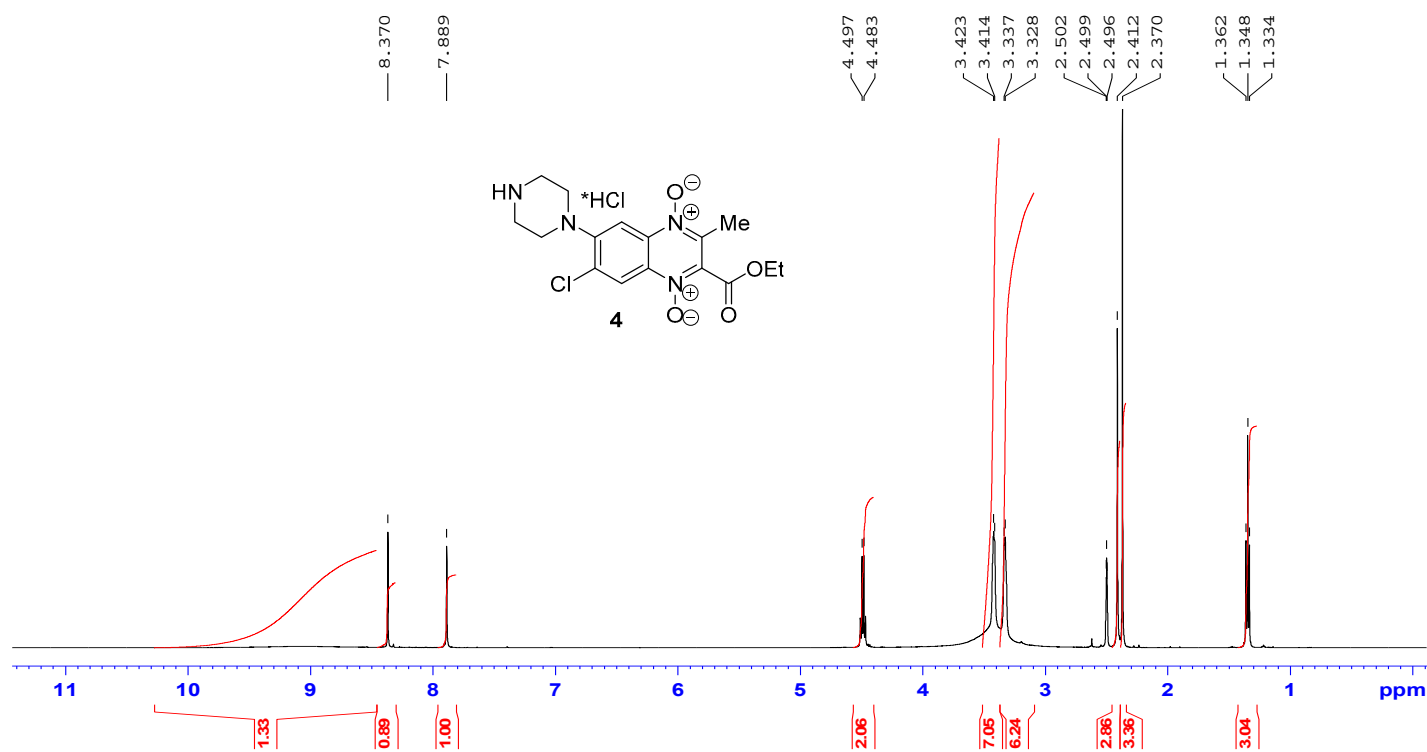

**Figure S6.** Copy of  $^{13}\text{C}$  NMR spectrum of the derivative **4**.

BG-127 DMSO- $d_6$

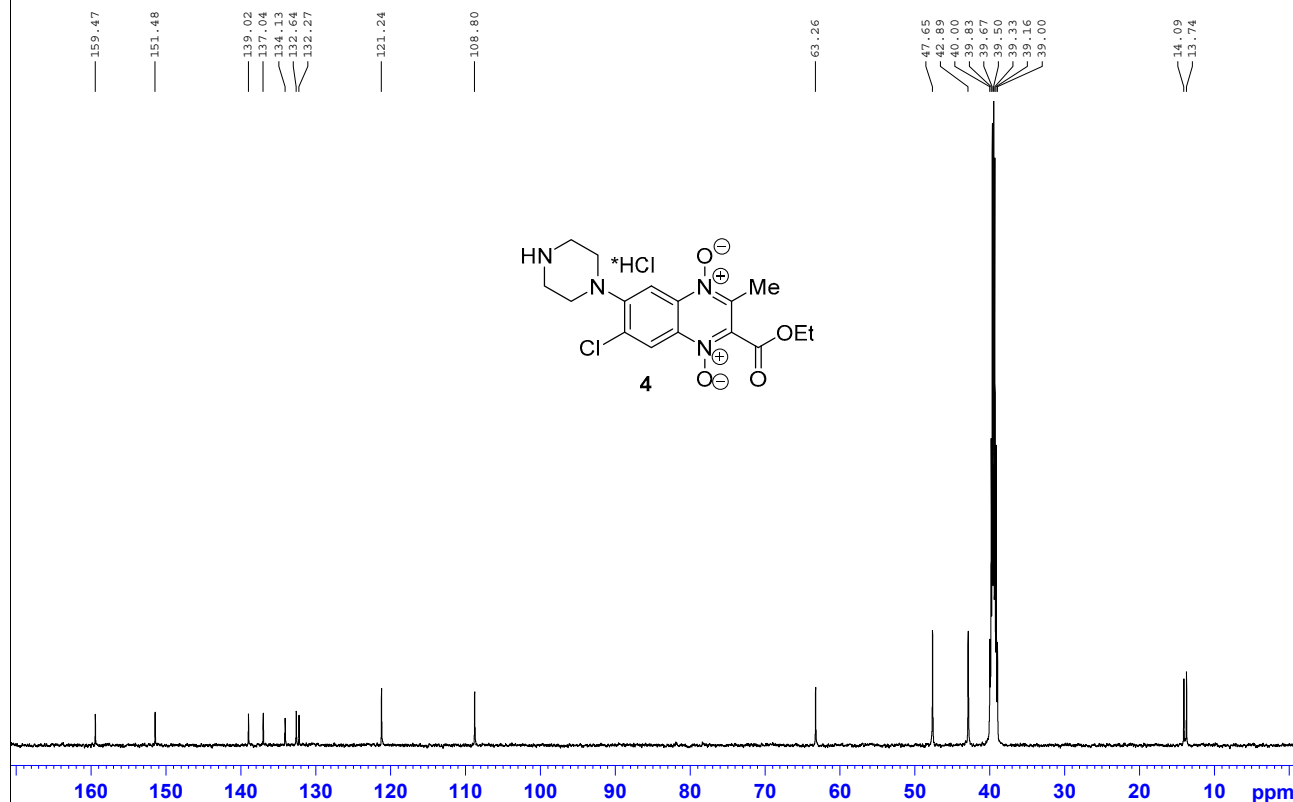

**Figure S7.** Copy of  $^1\text{H}$  NMR spectrum of the derivative **5**.

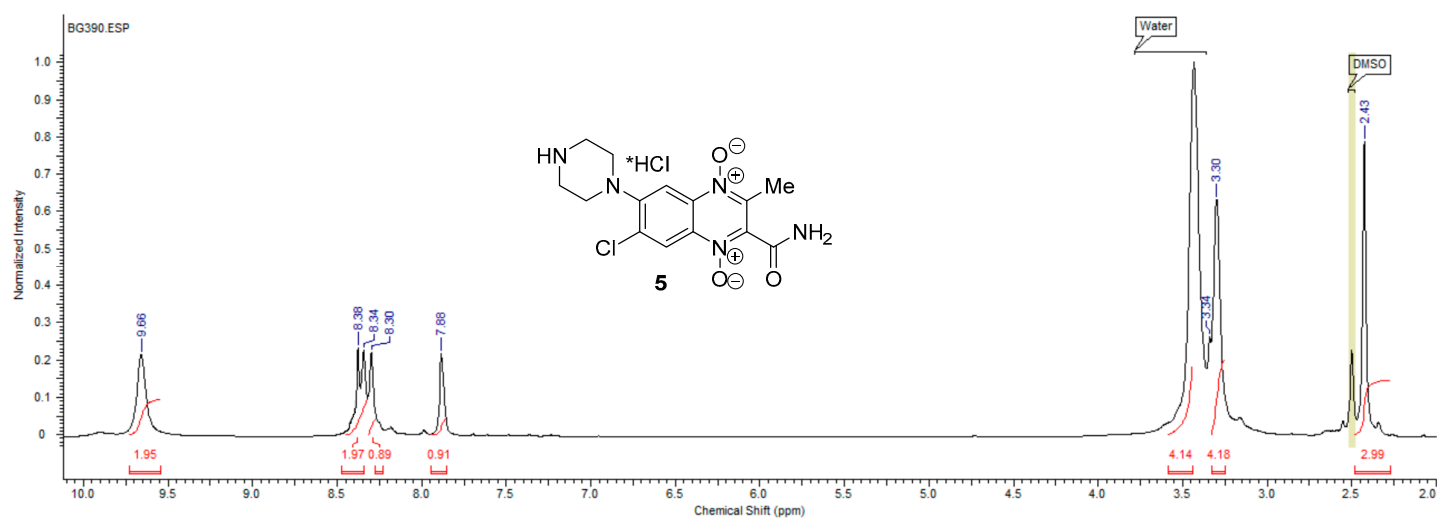

**Figure S8.** Copy of  $^{13}\text{C}$  NMR spectrum of the derivative **5**.

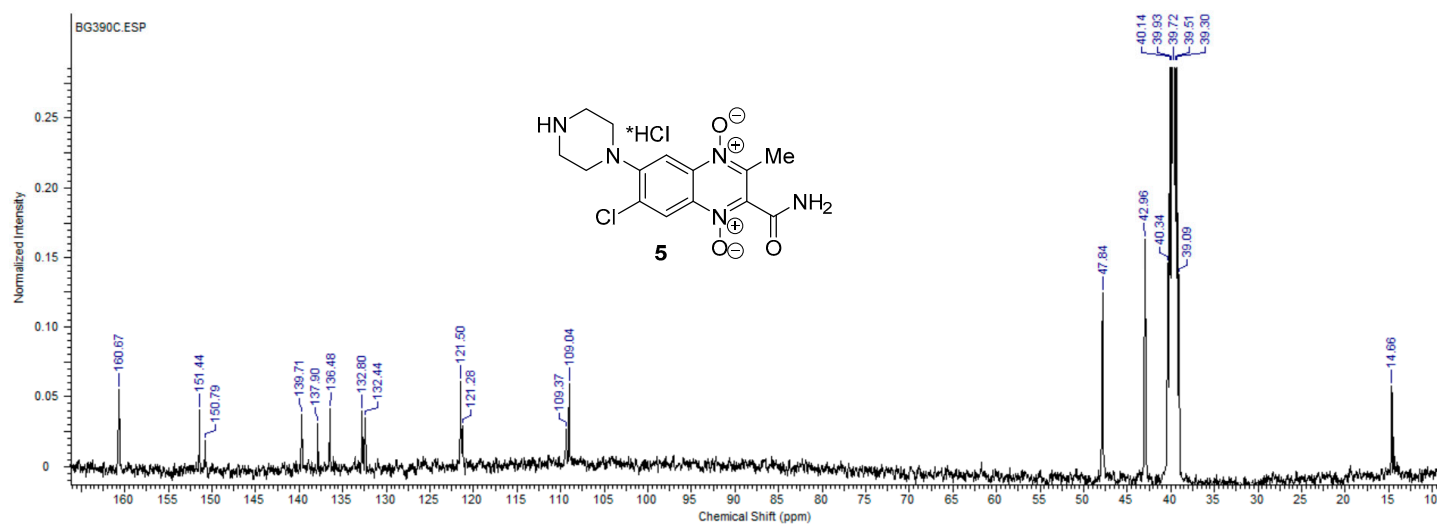

**Figure S9.** Copy of  $^1\text{H}$  NMR spectrum of the derivative **6**.

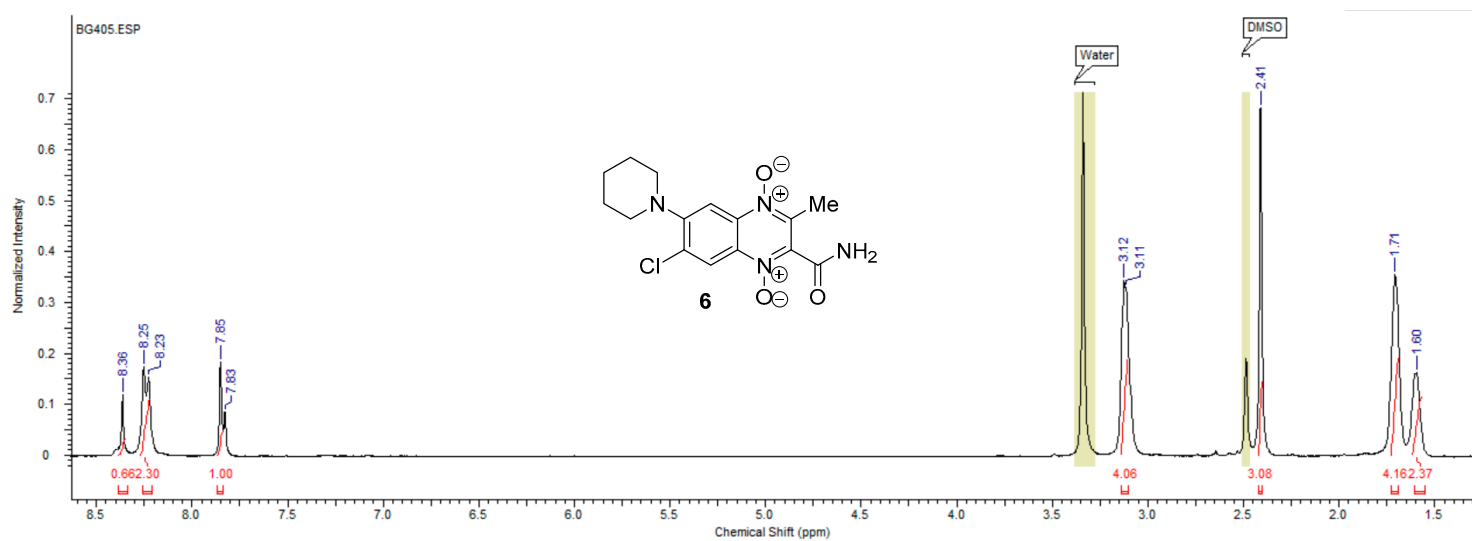

**Figure S10.** Copy of  $^{13}\text{C}$  NMR spectrum of the derivative **6**.

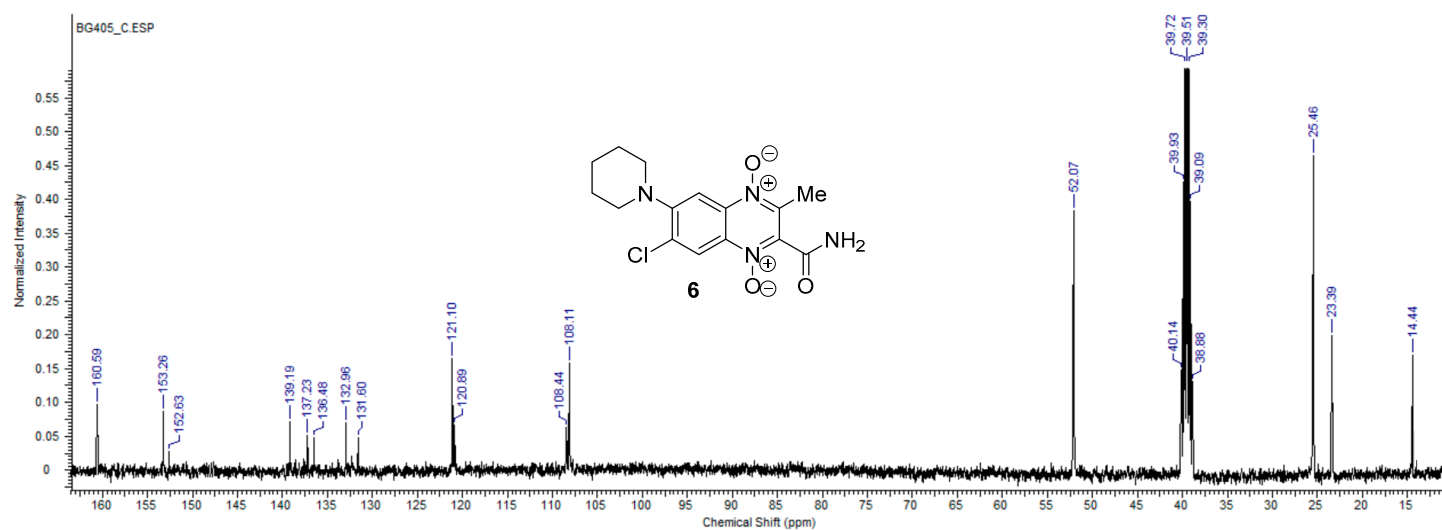

**Figure S11.** Copy of  $^1\text{H}$  NMR spectrum of the derivative **7**.

BG-391 DMSO- $d_6$

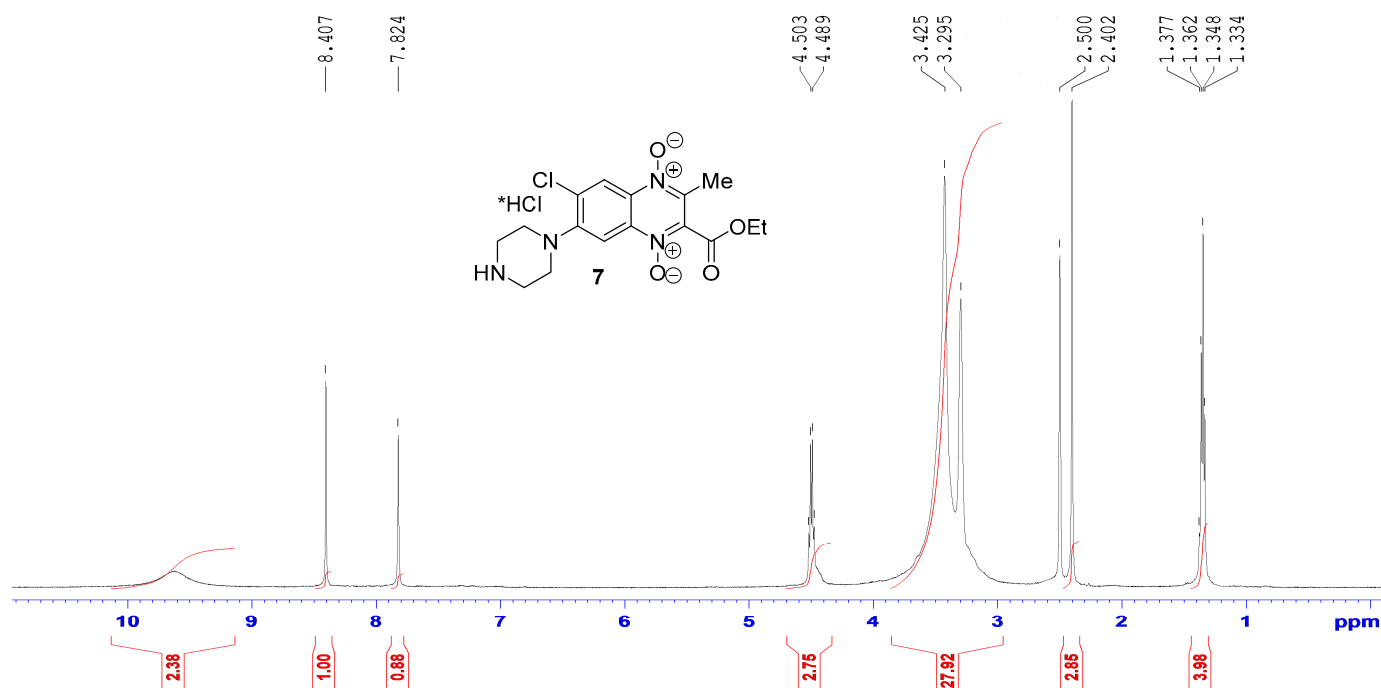

**Figure S12.** Copy of  $^{13}\text{C}$  NMR spectrum of the derivative **7**.

BG-391  $^{13}\text{C}$

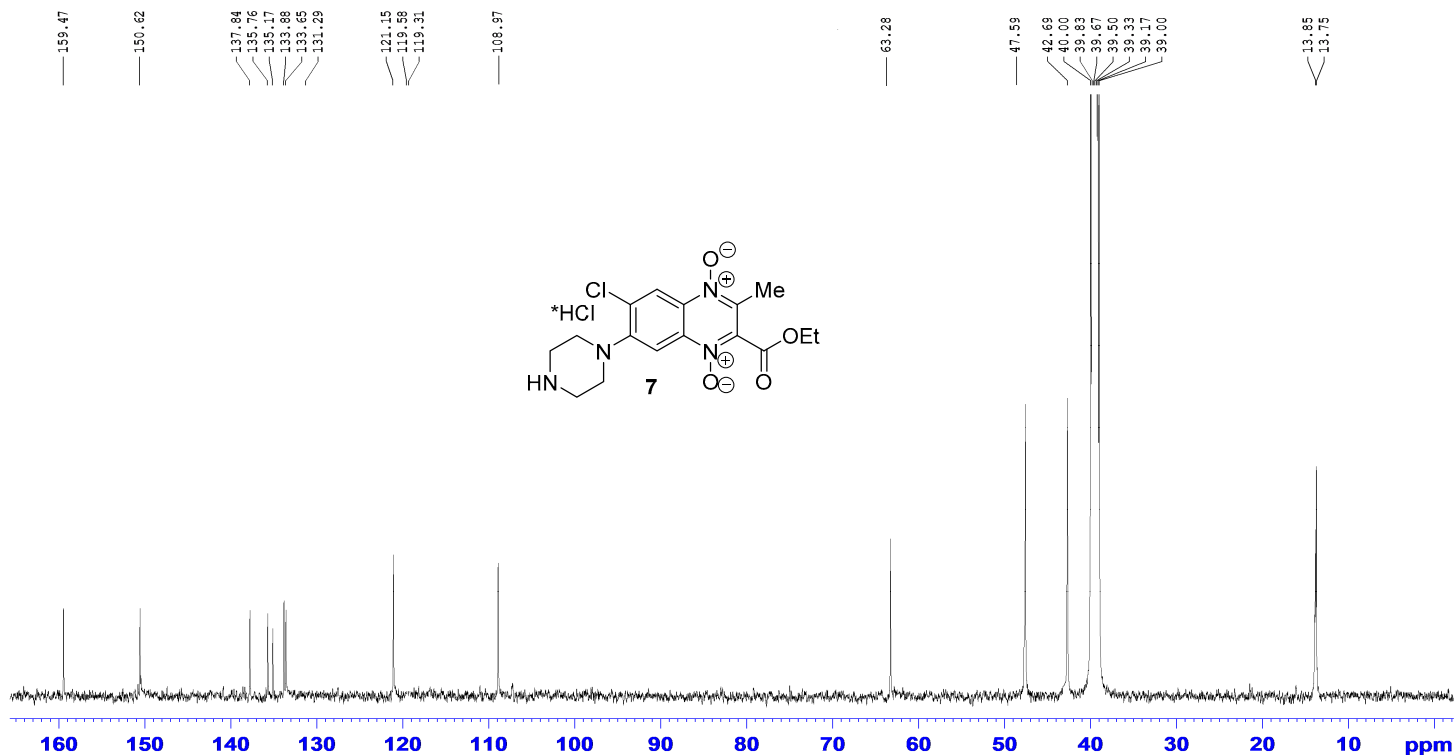

**Figure S13.** Copy of  $^1\text{H}$  NMR spectrum of the derivative **8**.

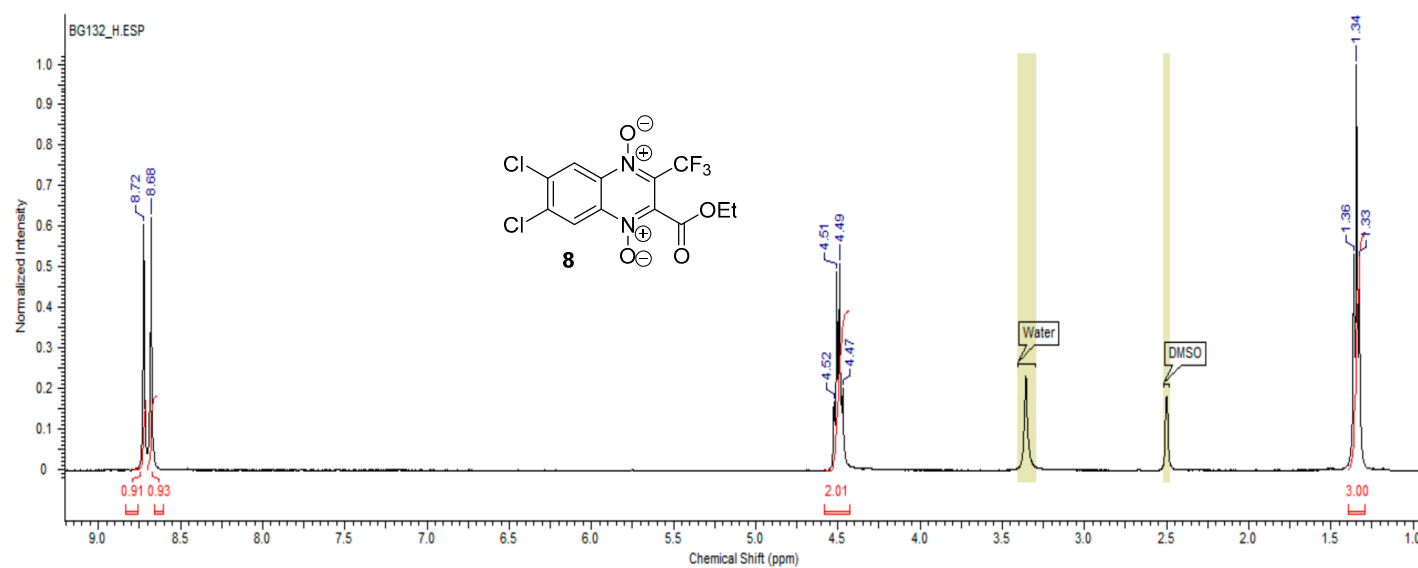

**Figure S14.** Copy of  $^{13}\text{C}$  NMR spectrum of the derivative **8**.

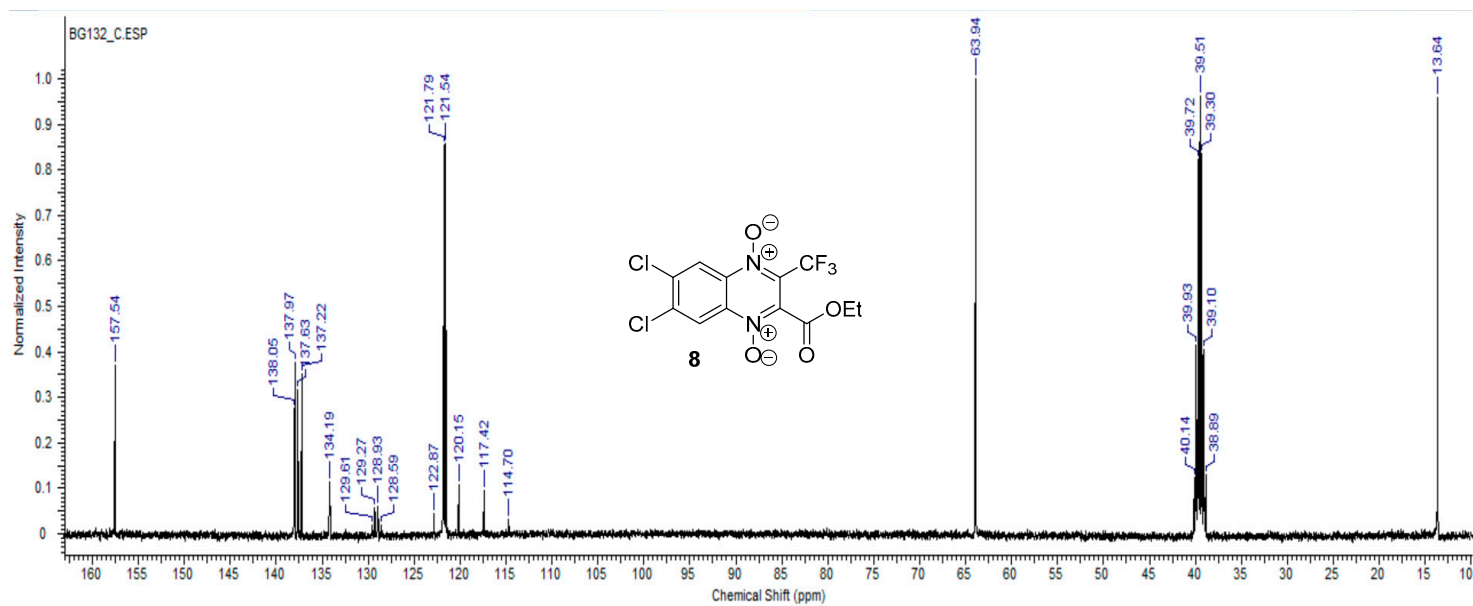



**Figure S15.** Copy of  $^1\text{H}$  NMR spectrum of the 2-ethoxycarbonyl-3-methylquinoxaline 1,4-dioxide.

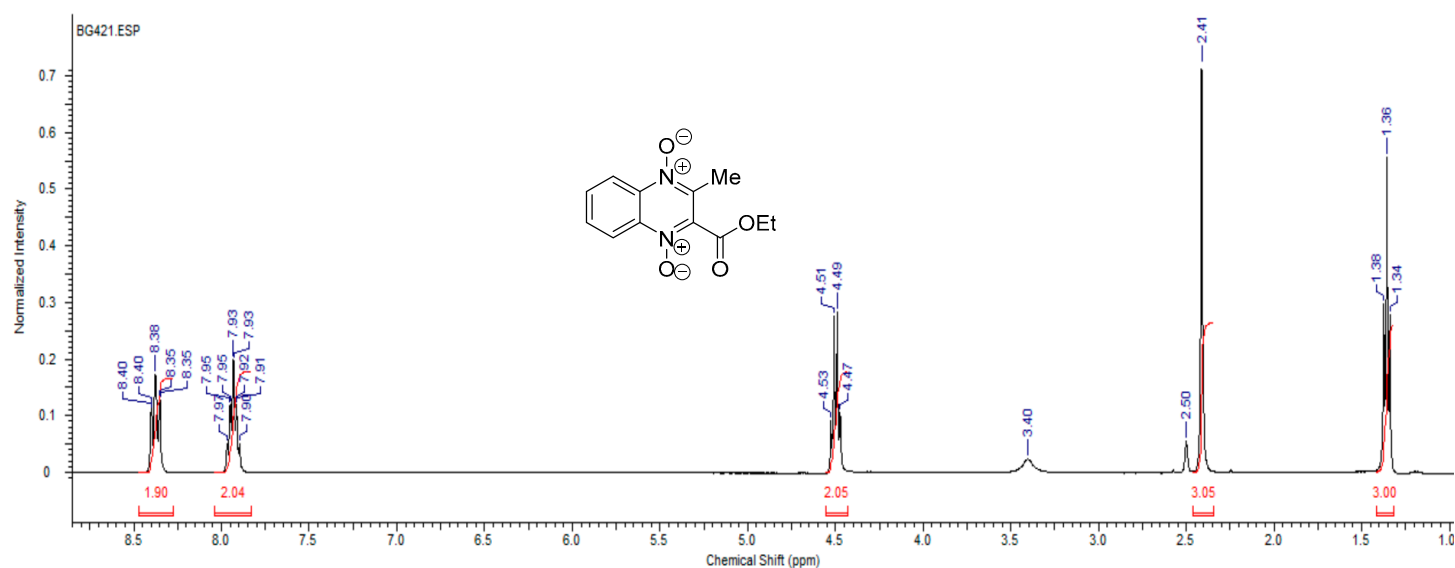

**Figure S16.** Copy of  $^{13}\text{C}$  NMR spectrum of the derivative the 2-ethoxycarbonyl-3-methylquinoxaline 1,4-dioxide.

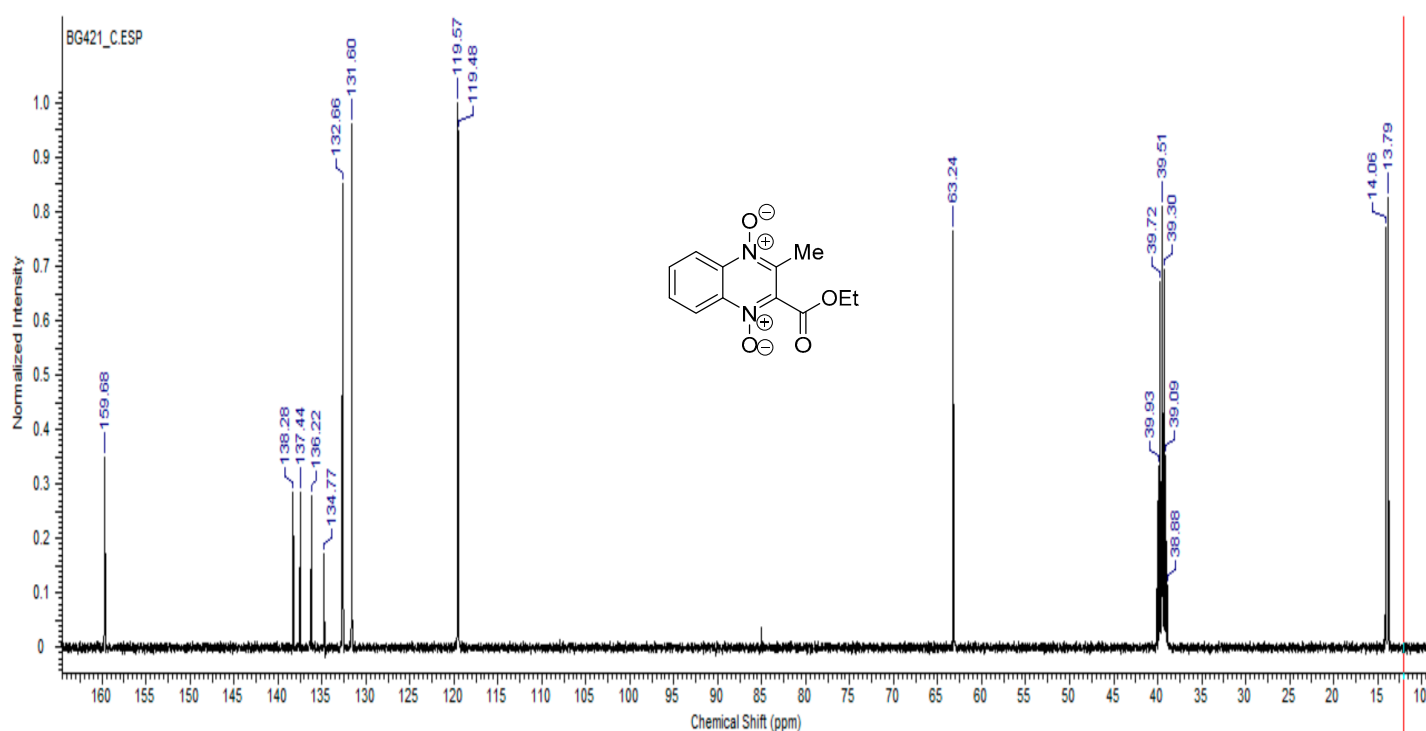

### Copies of HRMS ESI Analysis

**Figure S17.** Copy of HRMS ESI analysis of the derivatives 4.

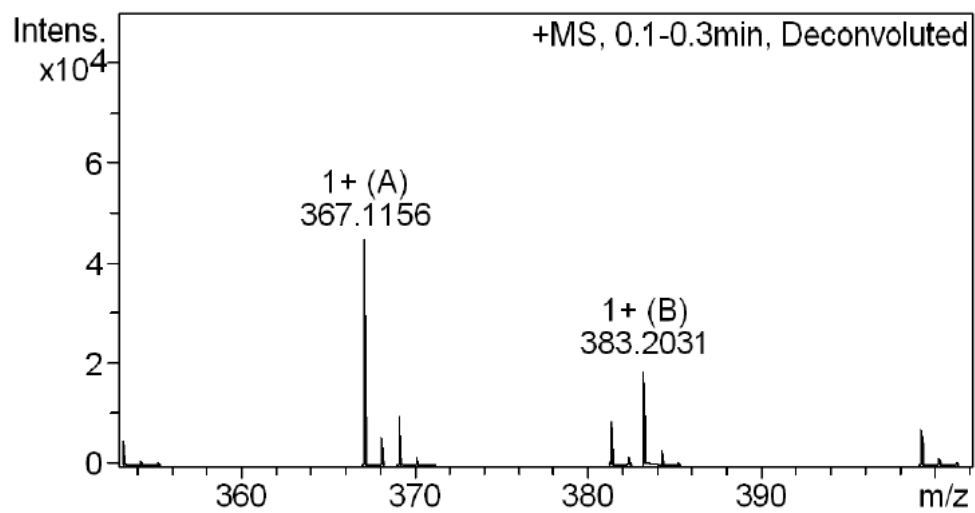

| # | m/z      | Res. | S/N | I     | I %   |
|---|----------|------|-----|-------|-------|
| 1 | 353.2651 |      |     | 4980  | 10.9  |
| 2 | 367.1156 |      |     | 45857 | 100.0 |
| 3 | 369.1132 |      |     | 10487 | 22.9  |
| 4 | 381.2963 |      |     | 9106  | 19.9  |
| 5 | 383.2031 |      |     | 20309 | 44.3  |
| 6 | 399.1762 |      |     | 7620  | 16.6  |

**Figure S18.** Copy of HRMS ESI analysis of the derivatives **5**.

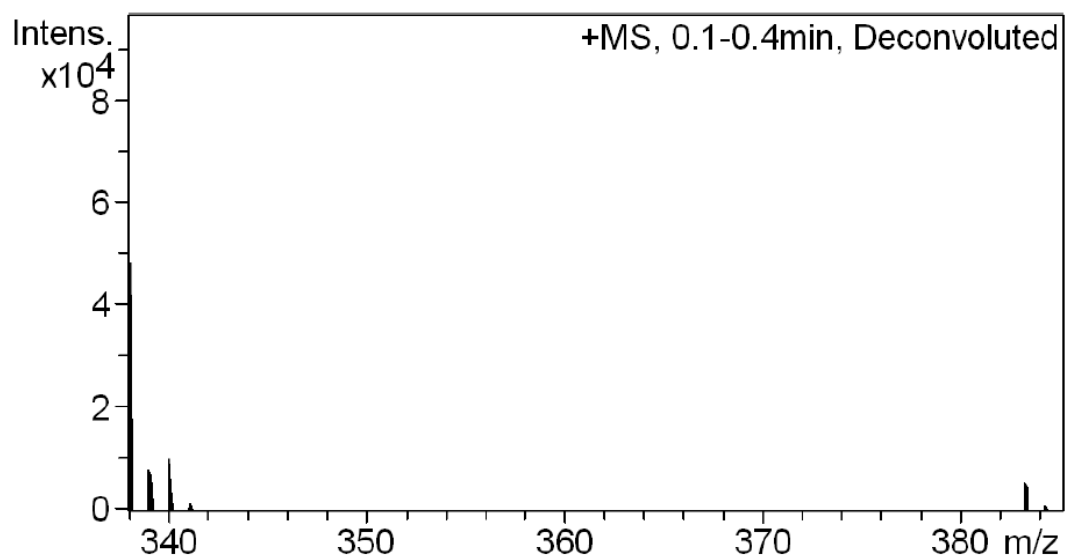

| # | m/z      | Res. | S/N | I     | I %   |
|---|----------|------|-----|-------|-------|
| 1 | 338.1001 |      |     | 49185 | 100.0 |
| 2 | 340.0984 |      |     | 10435 | 21.2  |
| 3 | 383.2033 |      |     | 5443  | 11.1  |

**Figure S19.** Copy of HRMS ESI analysis of the derivatives **6**.

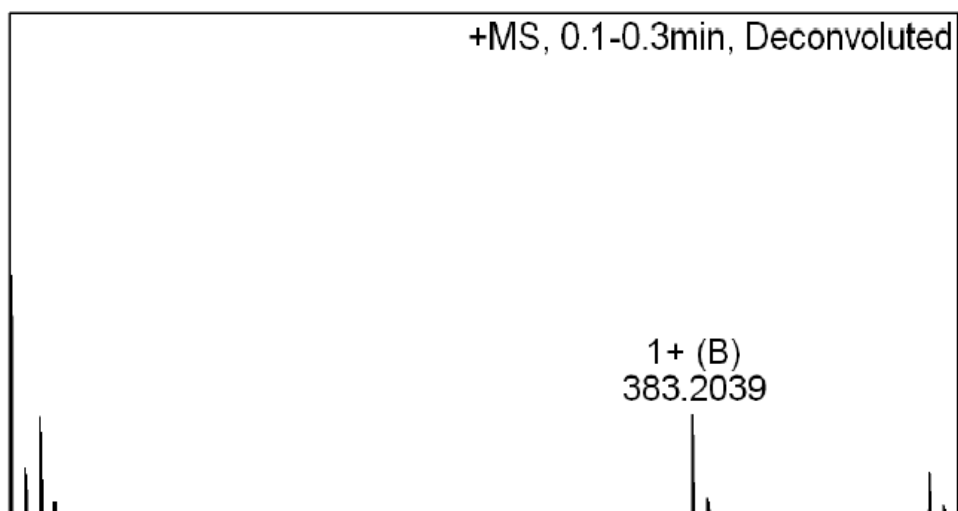

| # | m/z      | Res. | S/N | I    | I %   |
|---|----------|------|-----|------|-------|
| 1 | 337.1056 |      |     | 4991 | 100.0 |
| 2 | 339.1040 |      |     | 1938 | 38.8  |
| 3 | 383.2039 |      |     | 2001 | 40.1  |
| 4 | 399.1759 |      |     | 866  | 17.4  |

**Figure S20.** Copy of HRMS ESI analysis of the derivatives 7.

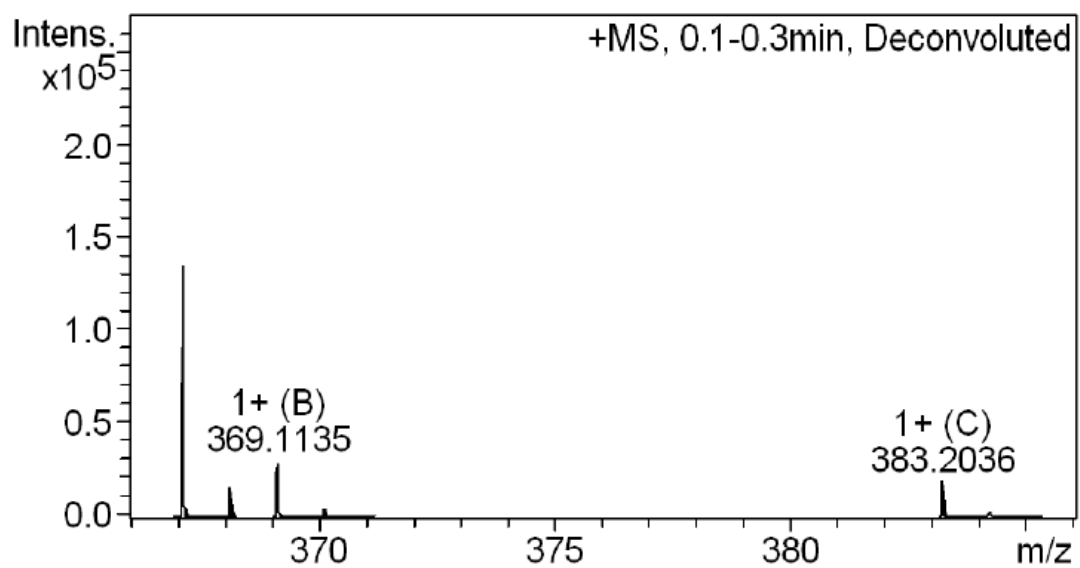

| # | m/z      | Res. | S/N | I      | I %   |
|---|----------|------|-----|--------|-------|
| 1 | 367.1166 |      |     | 136969 | 100.0 |
| 2 | 369.1135 |      |     | 29731  | 21.7  |
| 3 | 383.2036 |      |     | 19119  | 14.0  |

## Copies of HPLC Analysis

**Figure S21.** Copy HPLC analysis of the derivative 4.

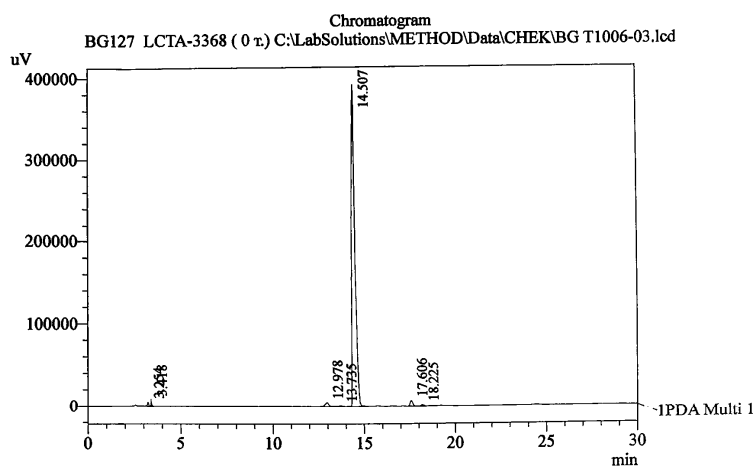

1 PDA Multi 1 / 274nm 4nm

PDA Ch1 274nm 4nm

| Peak# | Ret. Time | Area    | Height | Area %  |
|-------|-----------|---------|--------|---------|
| 1     | 3.254     | 23293   | 4606   | 0.453   |
| 2     | 3.418     | 24715   | 8545   | 0.480   |
| 3     | 12.978    | 63092   | 4781   | 1.226   |
| 4     | 13.735    | 11958   | 1018   | 0.232   |
| 5     | 14.507    | 4937973 | 390981 | 95.948  |
| 6     | 17.606    | 68747   | 6733   | 1.336   |
| 7     | 18.225    | 16713   | 1648   | 0.325   |
| Total |           | 5146490 | 418312 | 100.000 |

Method Filename : FOS Cv.lcm 06.10.2023 14:12:28

| Time  | Unit       | Command | Value |
|-------|------------|---------|-------|
| 0.01  | Pumps      | B.Conc  | 10    |
| 30.00 | Pumps      | B.Conc  | 50    |
| 33.00 | Pumps      | B.Conc  | 10    |
| 45.00 | Controller | Stop    |       |

Shimadzu LC-20 AD; System - FOS Colon- Kromasil-100-5µm. C-18, 4,6x250 mm. N 62511  
Elution: A - H<sub>3</sub>PO<sub>4</sub> 0,01M pH 2,6; B - MeCN, fl - 1.0 ml/min, loop 20 µl

Figure S22. Copy HPLC analysis of the derivative 5.

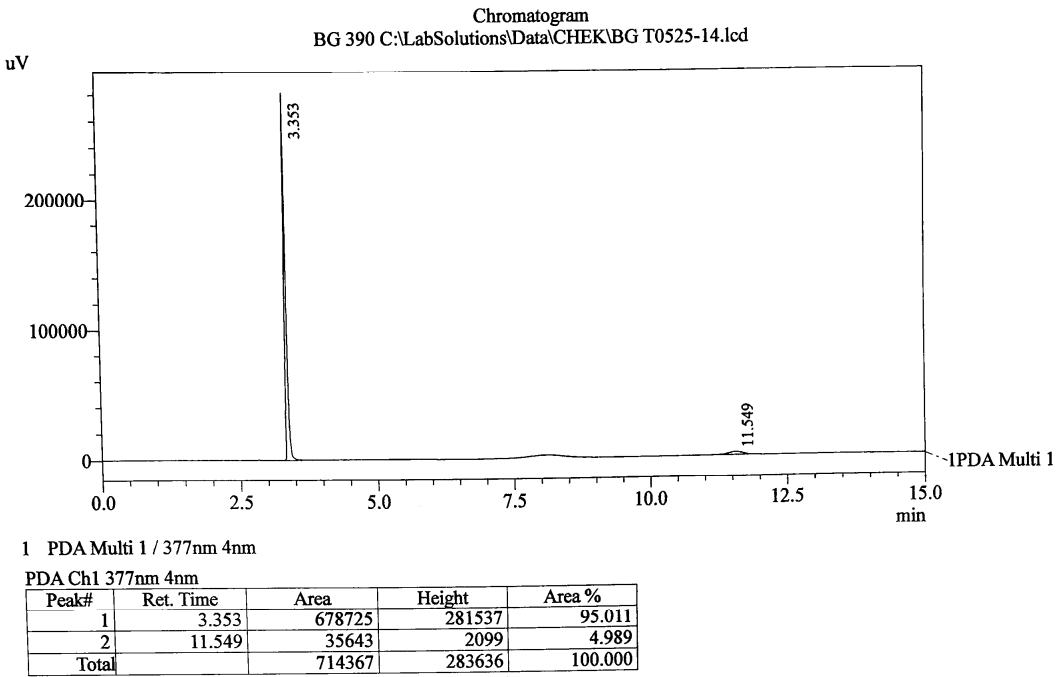

Method Filename : FRA02 vA.lcm 30.05.2023 13:58:19

| Time  | Unit       | Command | Valu |
|-------|------------|---------|------|
| 0.01  | Pumps      | B.Conc  | 7    |
| 10.00 | Pumps      | B.Conc  | 7    |
| 30.00 | Pumps      | B.Conc  | 40   |
| 33.00 | Pumps      | B.Conc  | 7    |
| 45.00 | Controller | Stop    |      |

Shimadzu LC-20 AD; System - FRA 02 vA, Colon- Kromasil C-18, 4,6x250 mm. 5 mkm, N 59967  
Elution: A - COOHNH4 0.2% pH 4.5; B - MeCN, fl - 1 ml/min, loop 20 mkl

**Figure S23.** Copy HPLC analysis of the derivative **6**.

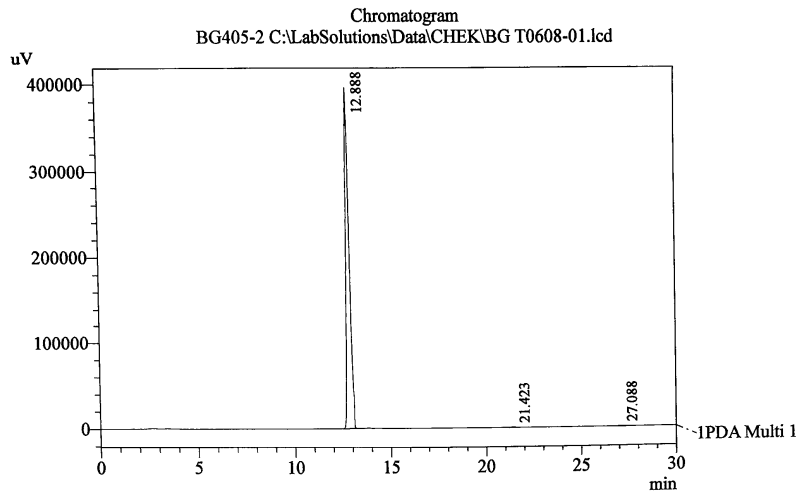

PDA Ch1 375nm 4nm

| Peak# | Ret. Time | Area    | Height | Area %  |
|-------|-----------|---------|--------|---------|
| 1     | 12.888    | 7646484 | 395884 | 99.746  |
| 2     | 21.423    | 10493   | 639    | 0.137   |
| 3     | 27.088    | 8982    | 528    | 0.117   |
| Total |           | 7665960 | 397051 | 100.000 |

Method Filename : FOS Av.lcm 08.06.2023 12:02:02

| Time  | Unit       | Command | Valu |
|-------|------------|---------|------|
| 0.01  | Pumps      | B.Conc  | 30   |
| 30.00 | Pumps      | B.Conc  | 50   |
| 35.00 | Pumps      | B.Conc  | 30   |
| 45.00 | Controller | Stop    |      |

Shimadzu LC-20 AD; System - FOS Colon- Kromasil-100-5mkm. C-18, 4,6x250 mm. N 62511  
Elution: A - H3PO4 0,01M pH 2,6; B - MeCN, fl - 1.0 ml/min, loop 20 mkl



**Figure S24.** Copy HPLC analysis of the derivative 7.

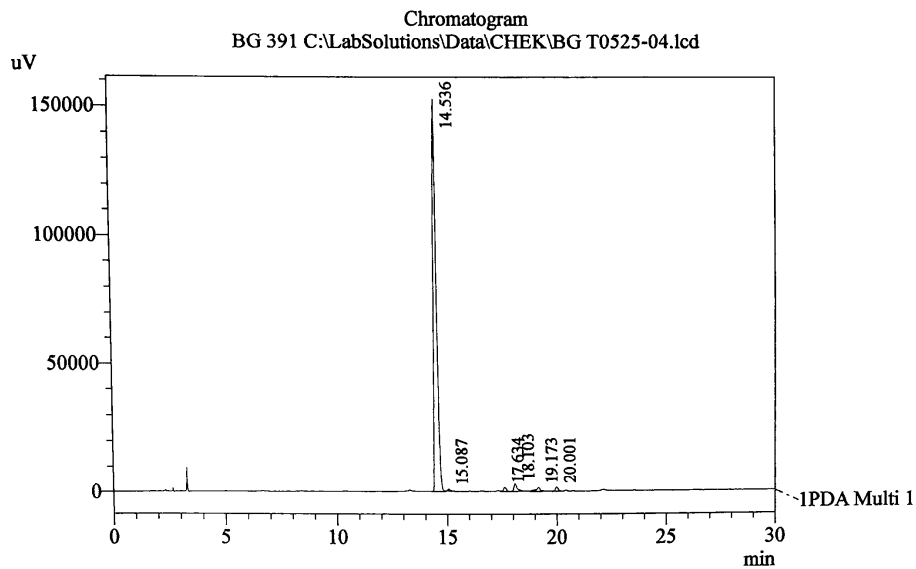

1 PDA Multi 1 / 370nm 4nm

PDA Ch1 370nm 4nm

| Peak# | Ret. Time | Area    | Height | Area %  |
|-------|-----------|---------|--------|---------|
| 1     | 14.536    | 1563763 | 152604 | 94.708  |
| 2     | 15.087    | 6165    | 769    | 0.373   |
| 3     | 17.634    | 14574   | 1585   | 0.883   |
| 4     | 18.103    | 30405   | 2944   | 1.841   |
| 5     | 19.173    | 20295   | 1489   | 1.229   |
| 6     | 20.001    | 15942   | 1686   | 0.966   |
| Total |           | 1651144 | 161077 | 100.000 |

Method Filename : FOS Av.lcm 26.05.2023 12:25:18

| Time  | Unit       | Command | Valu |
|-------|------------|---------|------|
| 0.01  | Pumps      | B.Conc  | 10   |
| 30.00 | Pumps      | B.Conc  | 50   |
| 35.00 | Pumps      | B.Conc  | 10   |
| 45.00 | Controller | Stop    |      |

Shimadzu LC-20 AD; System - FOS Colon- Kromasil-100-5mkm. C-18, 4,6x250 mm. N 62511  
Elution: A - H3PO4 0,01M pH 2,6; B - MeCN, fl - 1.0 ml/min, loop 20 mkl

## Copies of IR Spectra

**Figure S25.** Copy of IR spectrum of the derivative **4**.

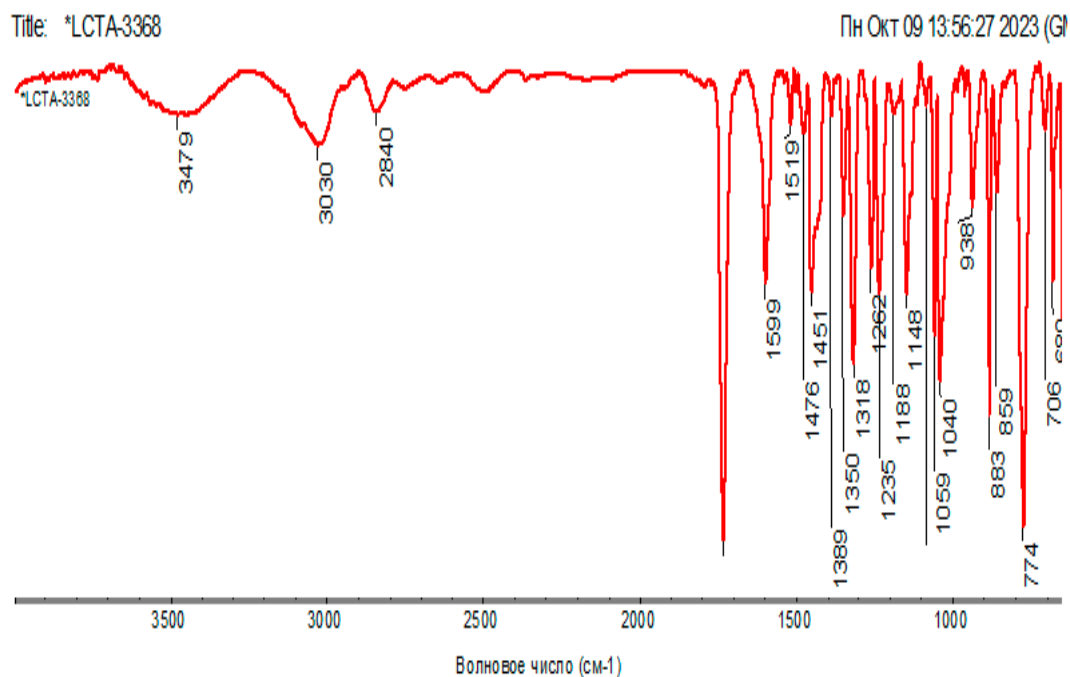

Expanded fingerprint region:

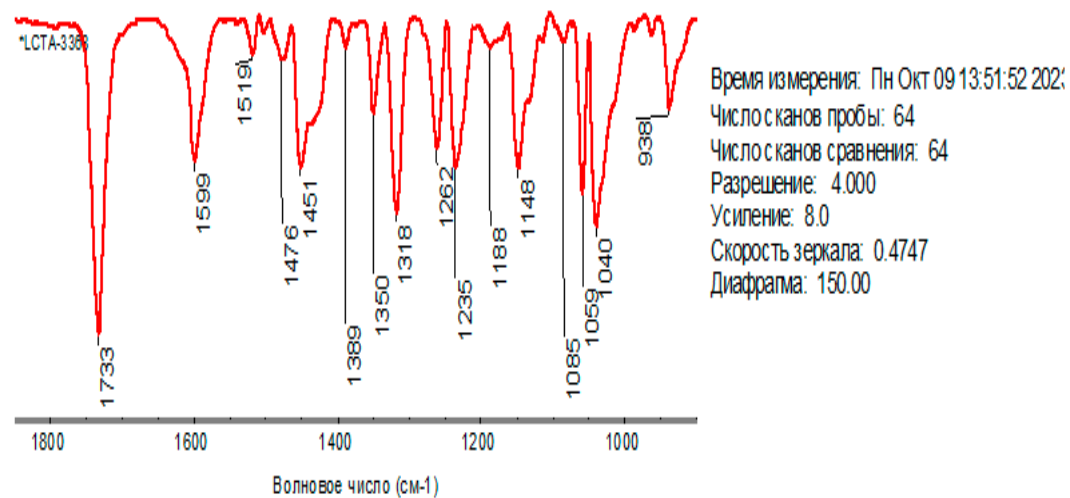

**Figure S26.** Copy of IR spectrum of the derivative **5**.

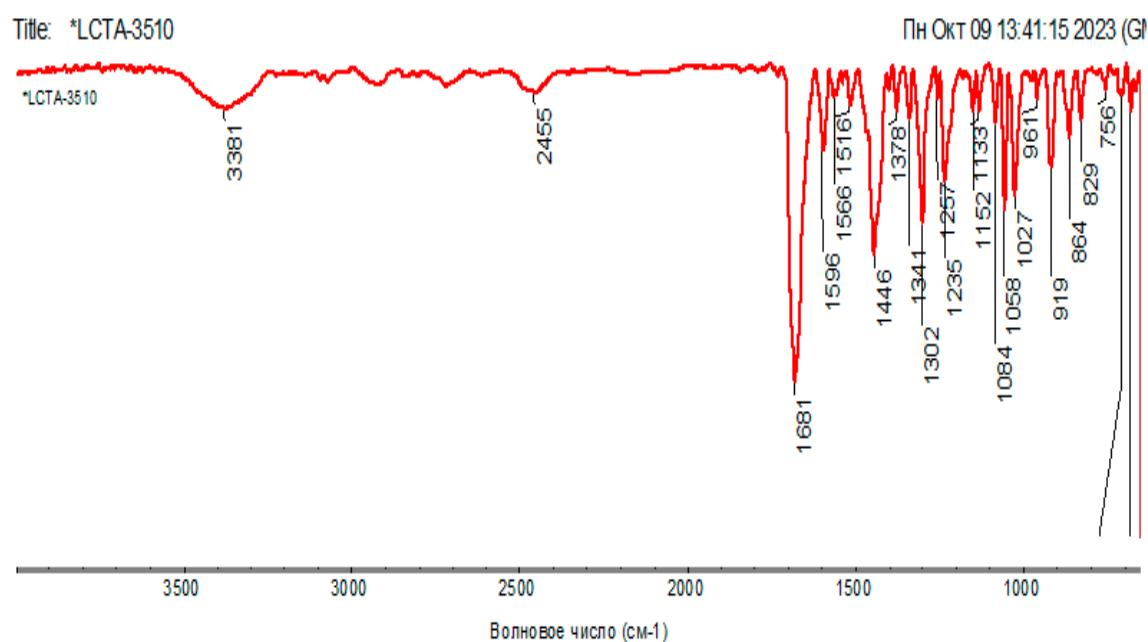

Expanded fingerprint region:

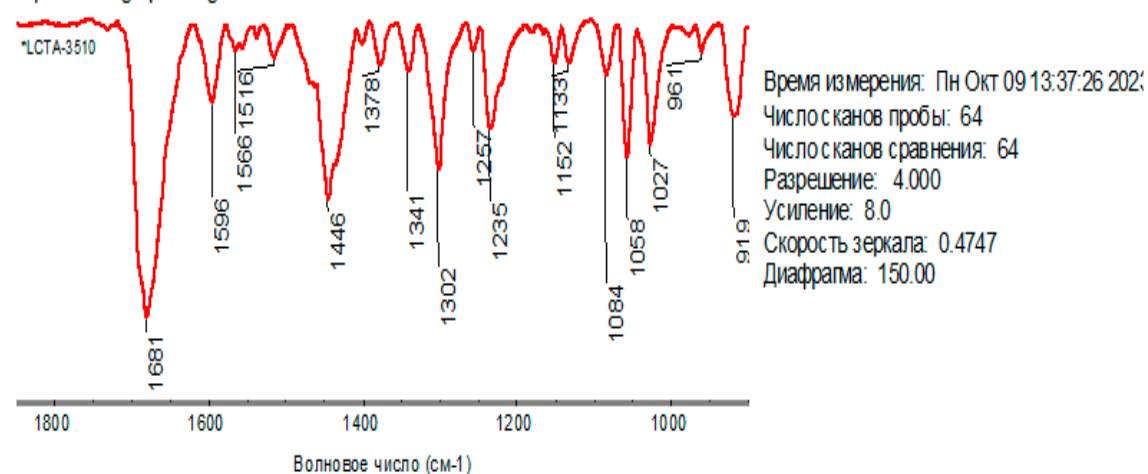

**Figure S27.** Copy of IR spectrum of the derivative **6**.

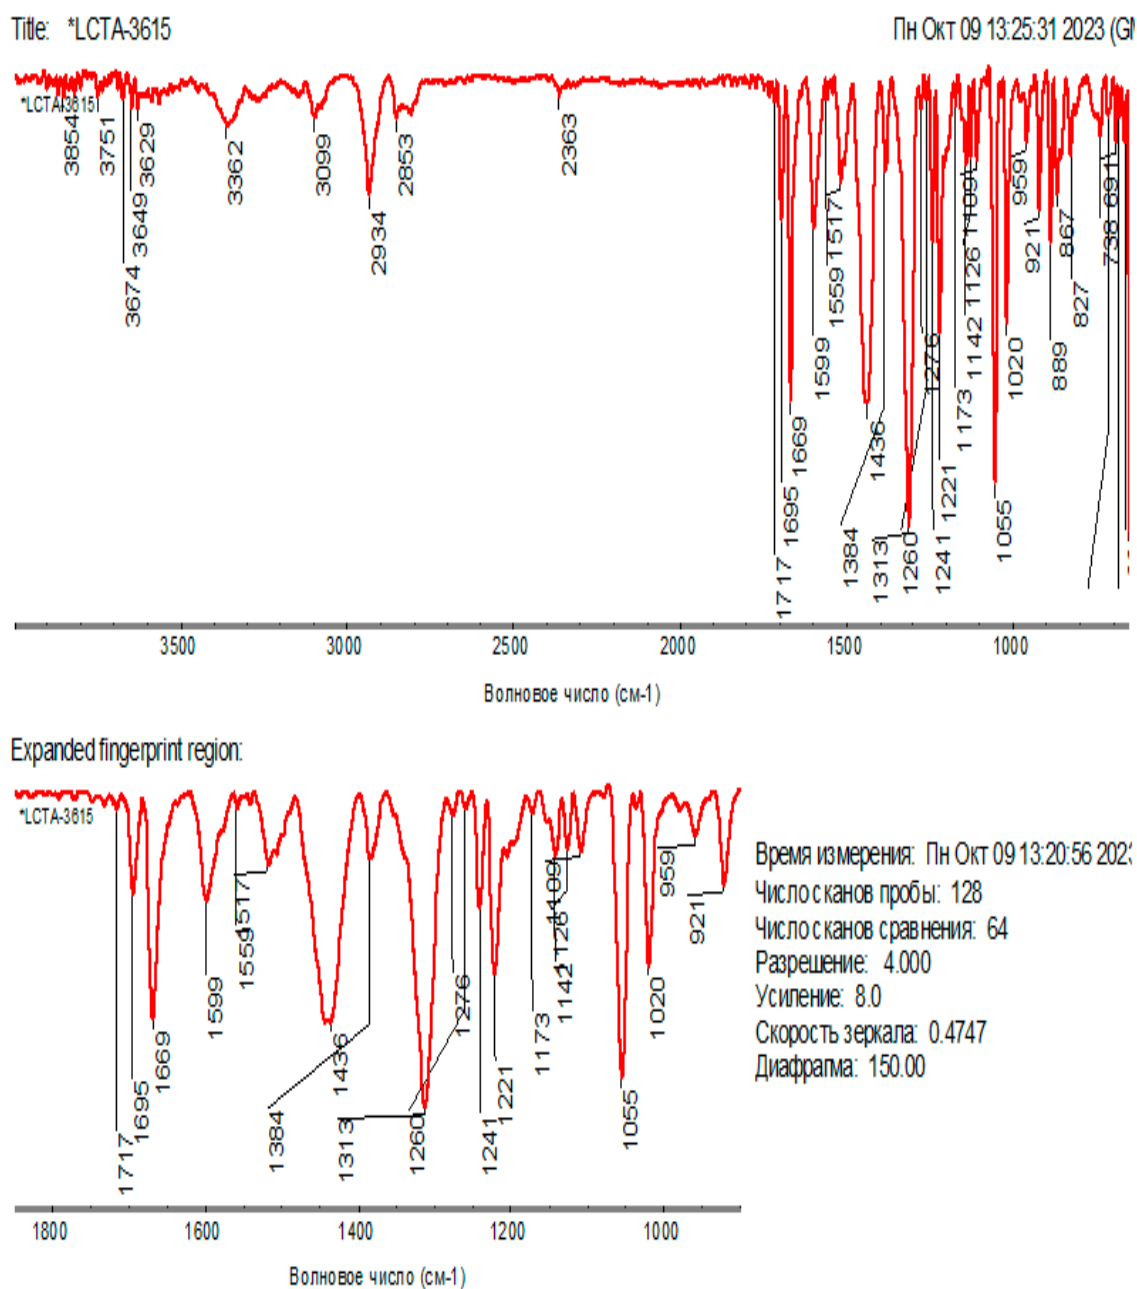

**Figure S28.** Copy of IR spectrum of the derivative 7.

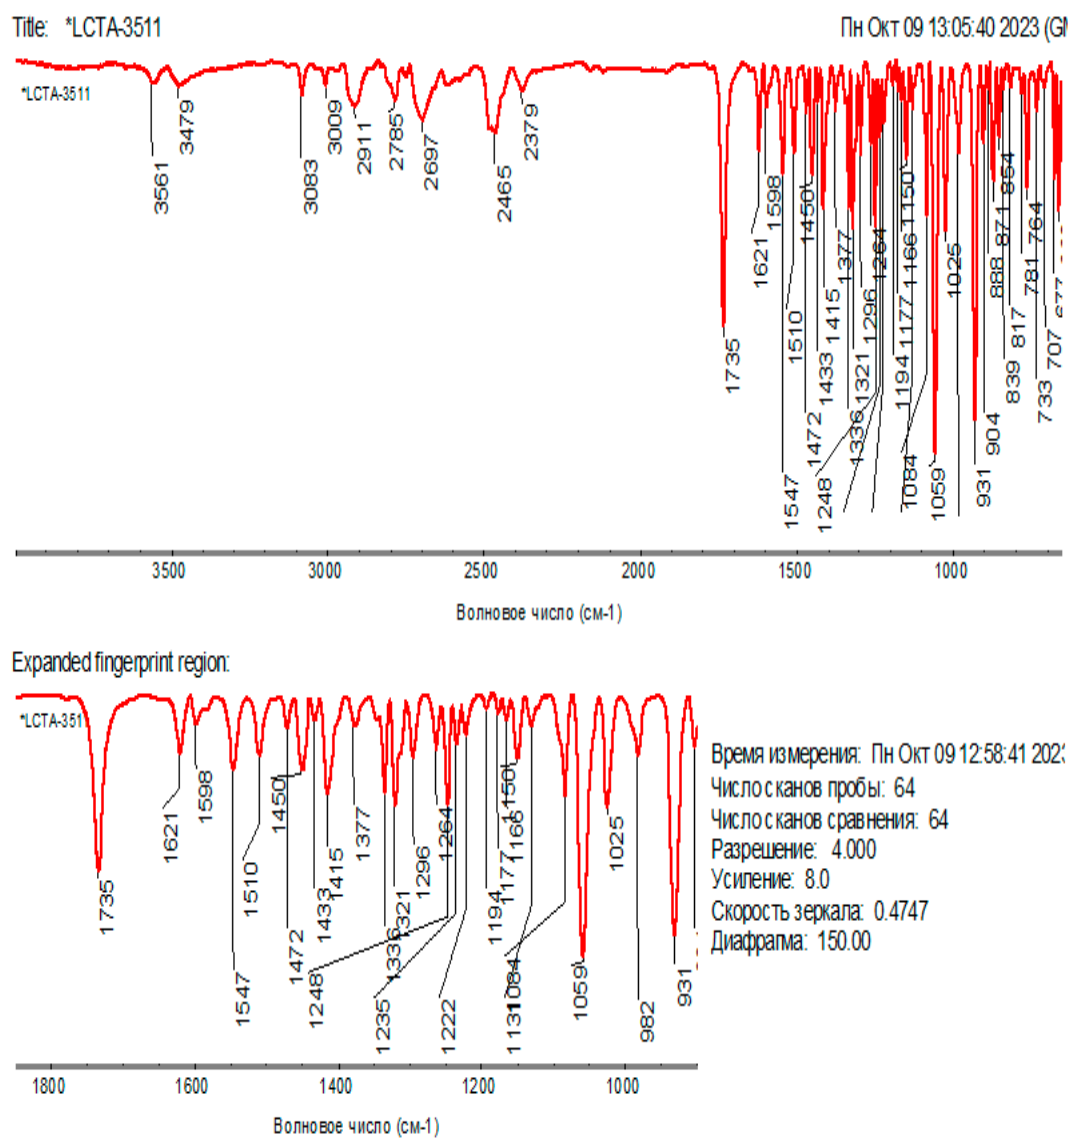

## Copies of 2D NMR Spectra of 4 and 7.

**Figure S29.**  $^1\text{H}$ - $^{13}\text{C}$  HSQC spectrum for compound 4.

HSQC DMSO

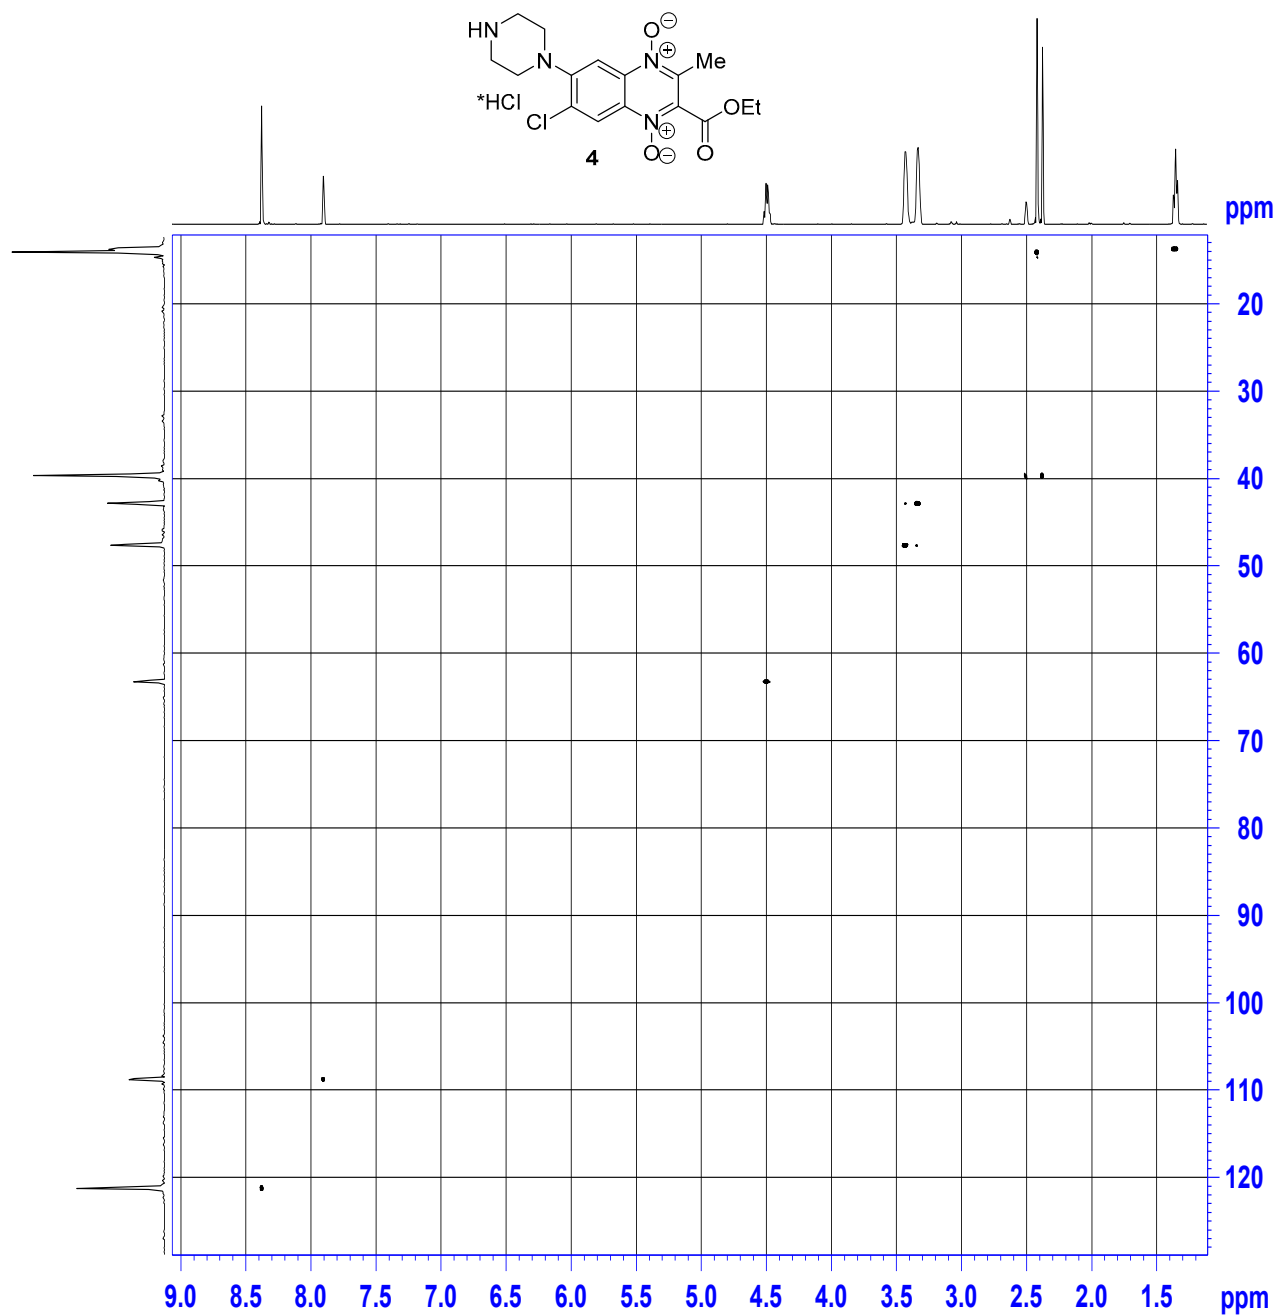

**Figure S30.** HMBC spectrum for compound **4**.

BG-127 DMSO-d<sub>6</sub> HMBC

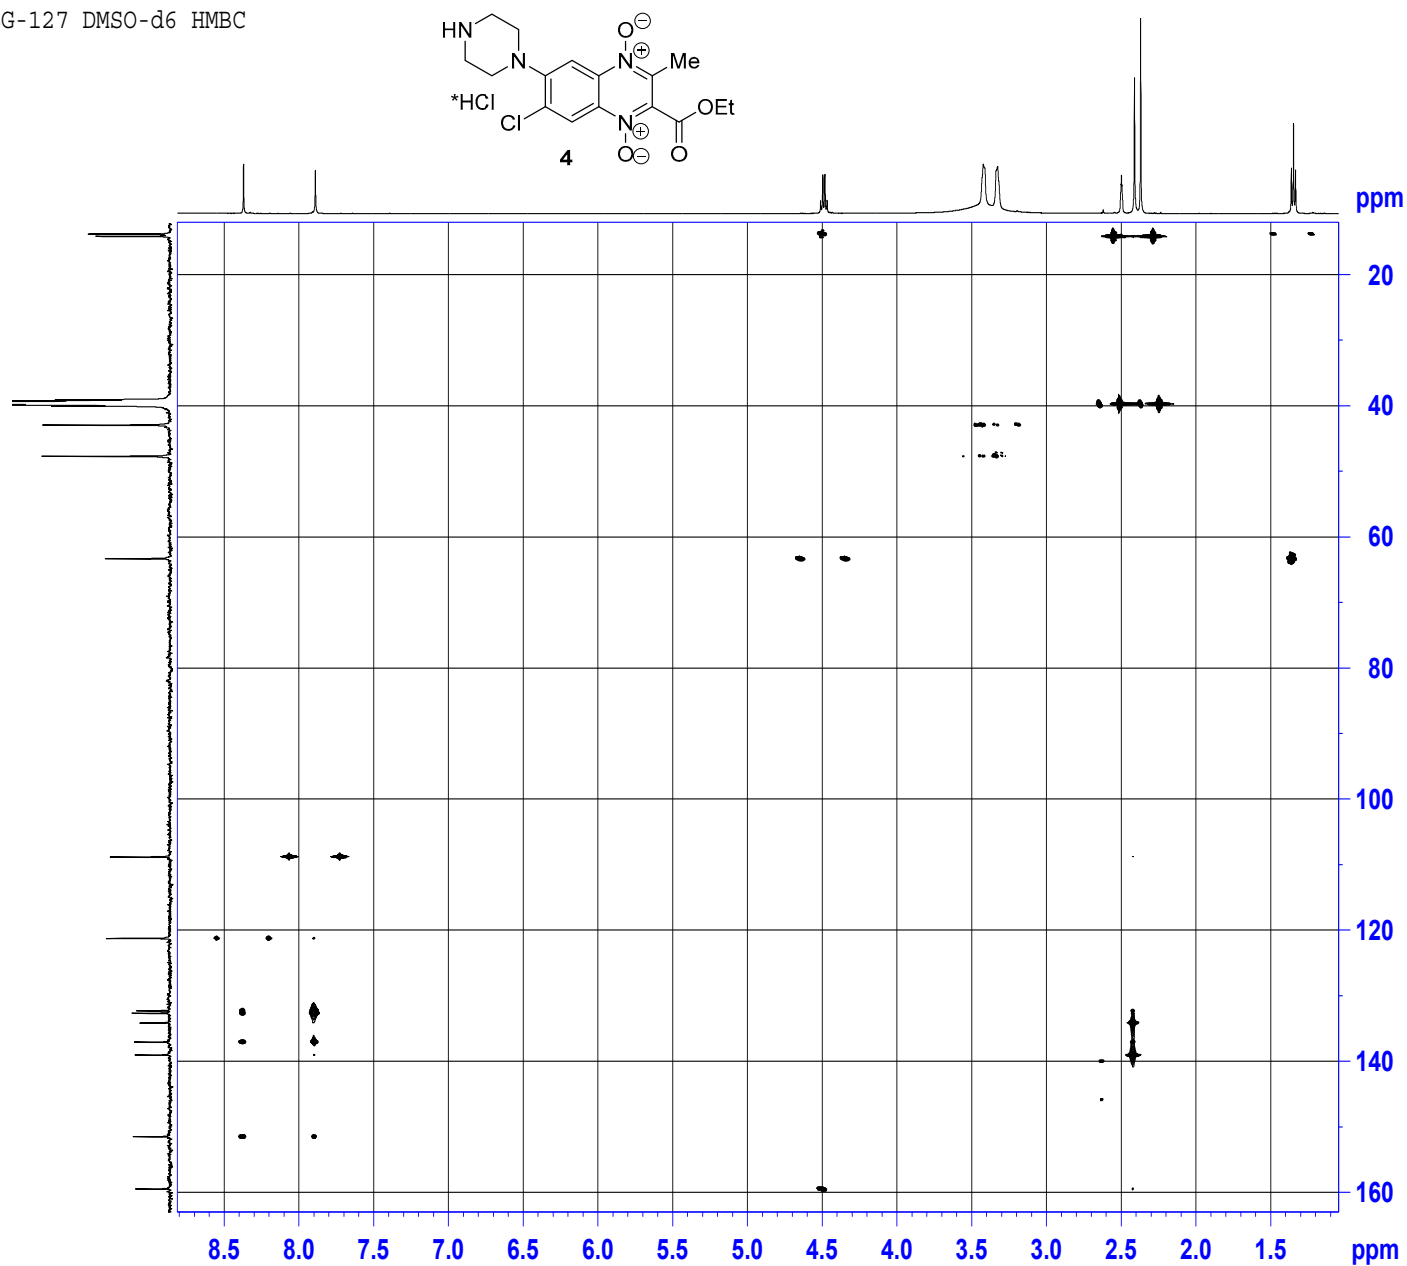

**Figure S31.** HMBC spectrum (fragment) for compound **4**.

BG-127 DMSO-d6 HMBC

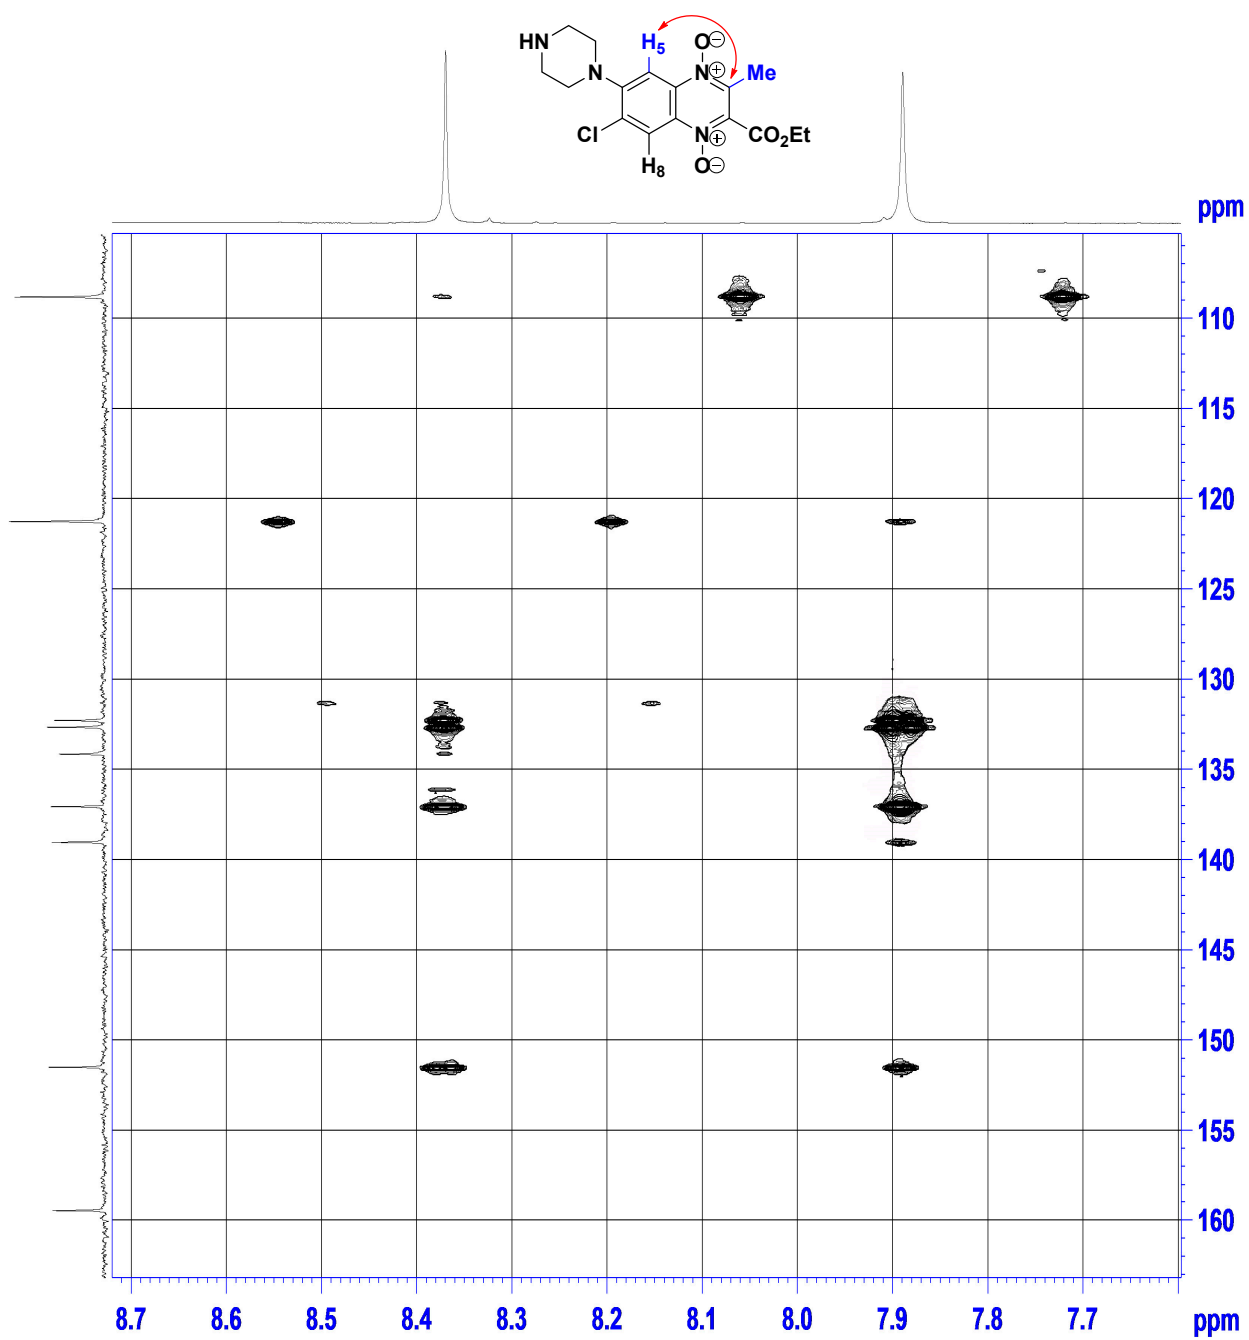



**Figure S32.**  $^1\text{H}$  2D NOESY spectrum of compound **4** in  $\text{DMSO-}d_6$  at 500 MHz.

BG-121, NOESY, Tm=500m

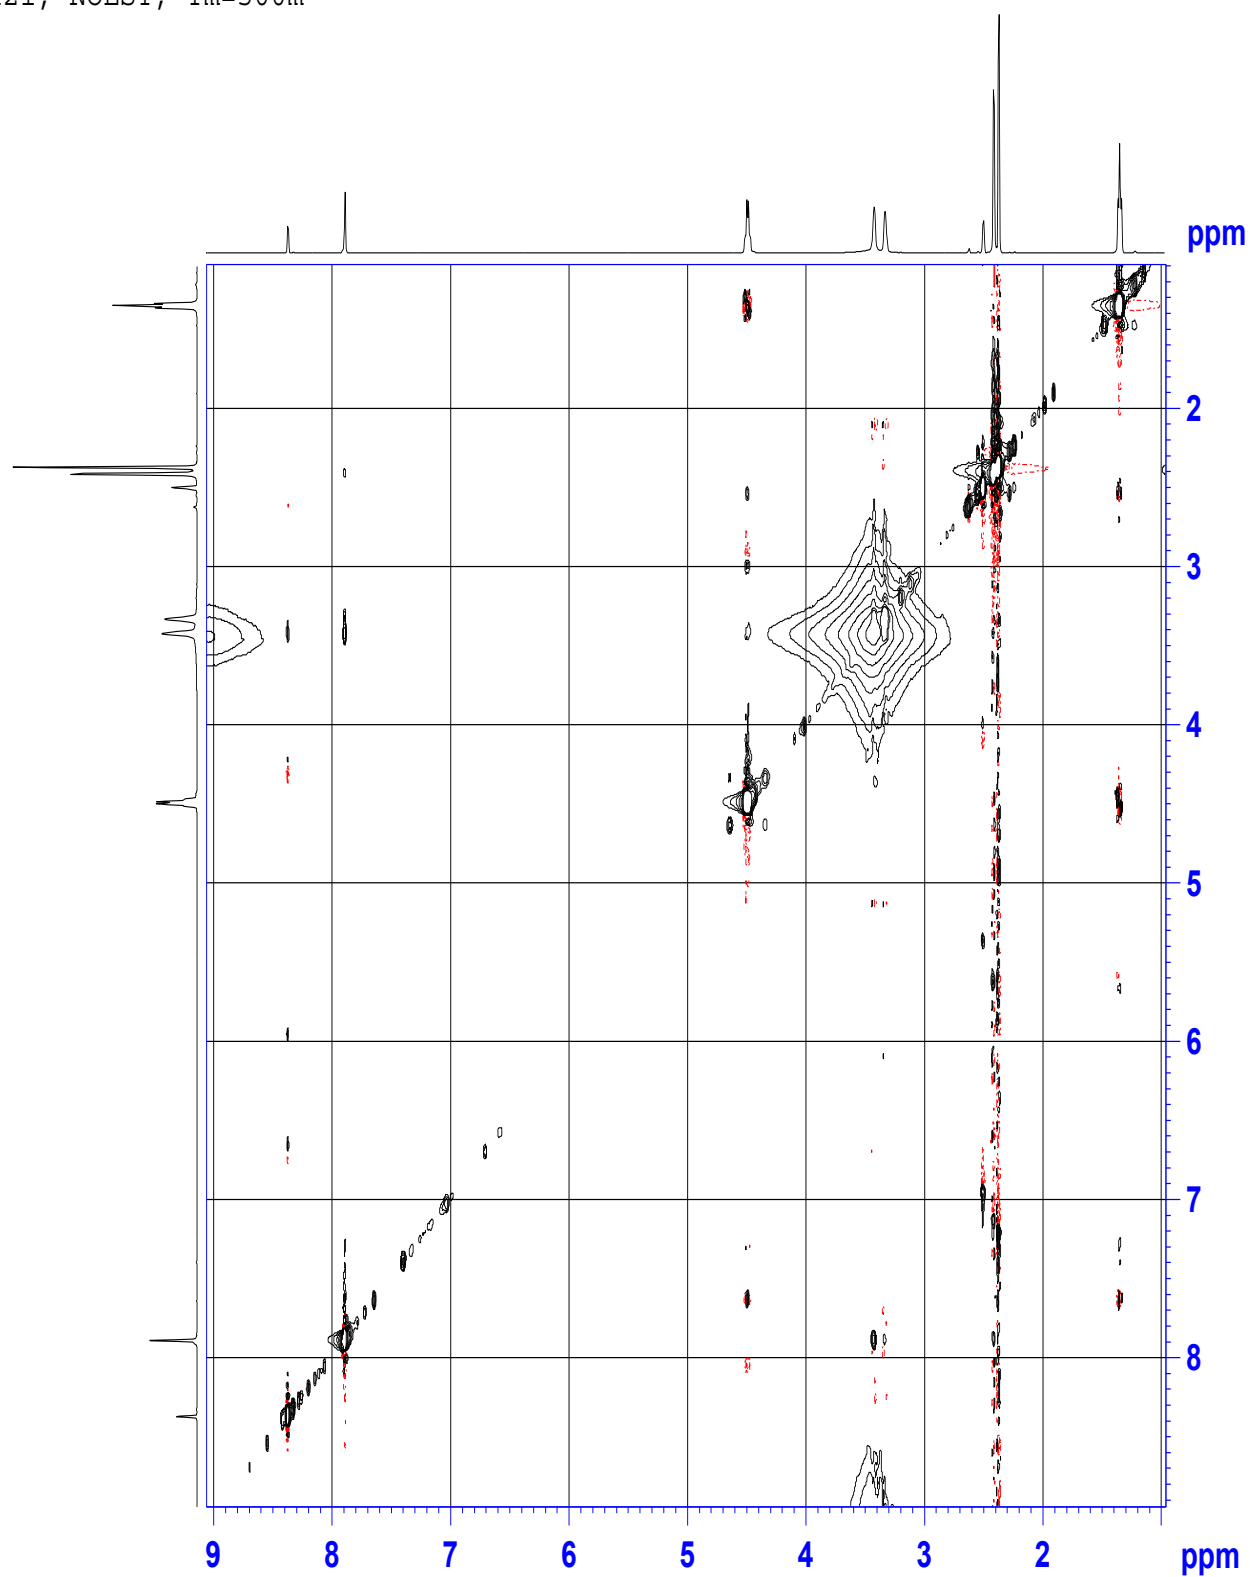

**Figure S33.** Selective NOE spectrum at CH<sub>3</sub> at 2.402 ppm for compound **4**.

BG-127 DMSO-d<sub>6</sub> Selective NOESY from CH<sub>3</sub>- (3)

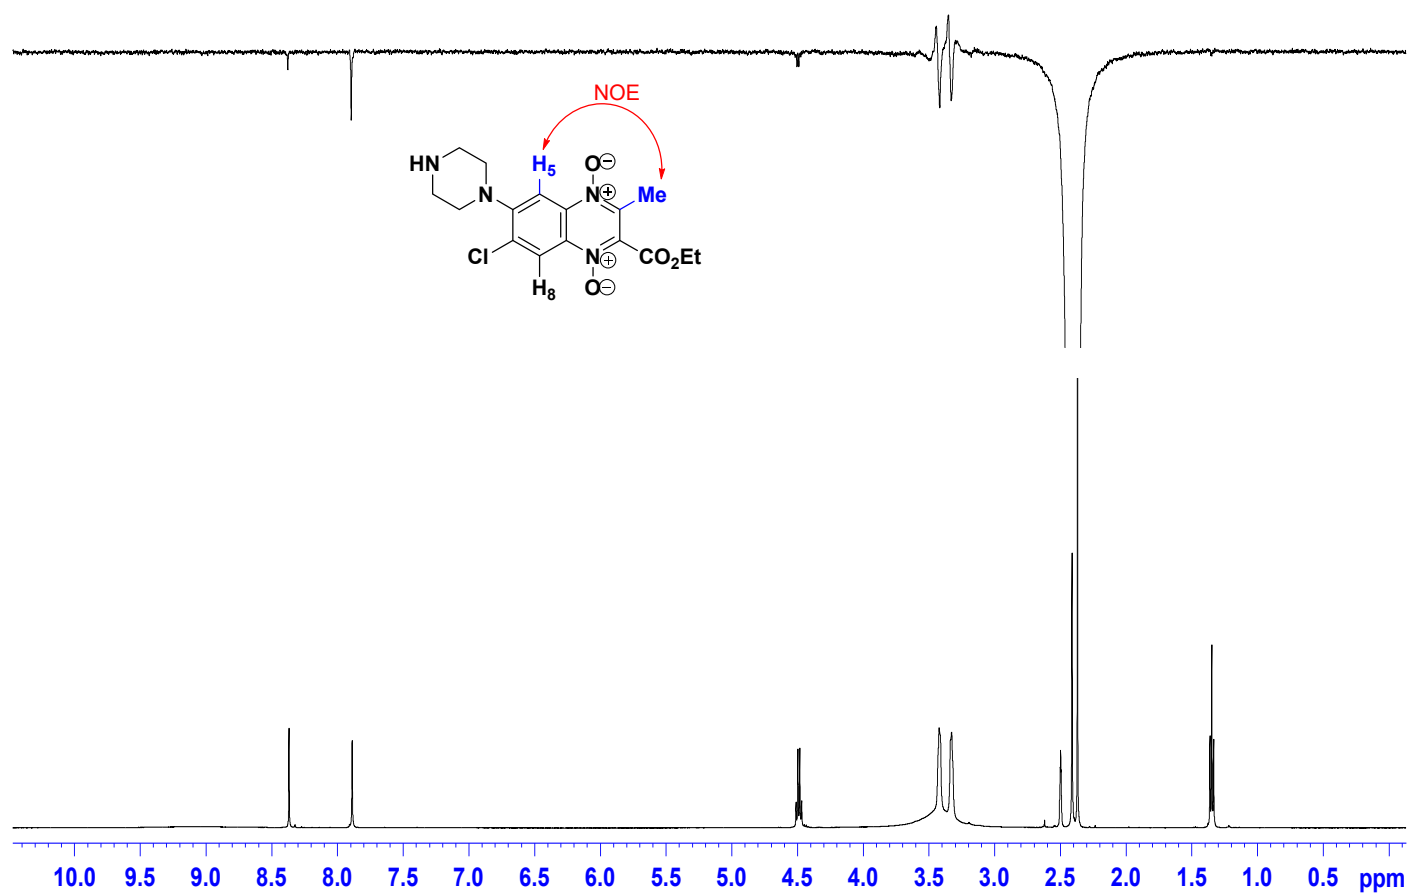

**Figure S34.**  $^1\text{H}$ - $^{13}\text{C}$  HSQC spectrum for compound **7**.

BG-391 DMSO- $d_6$  HSQC

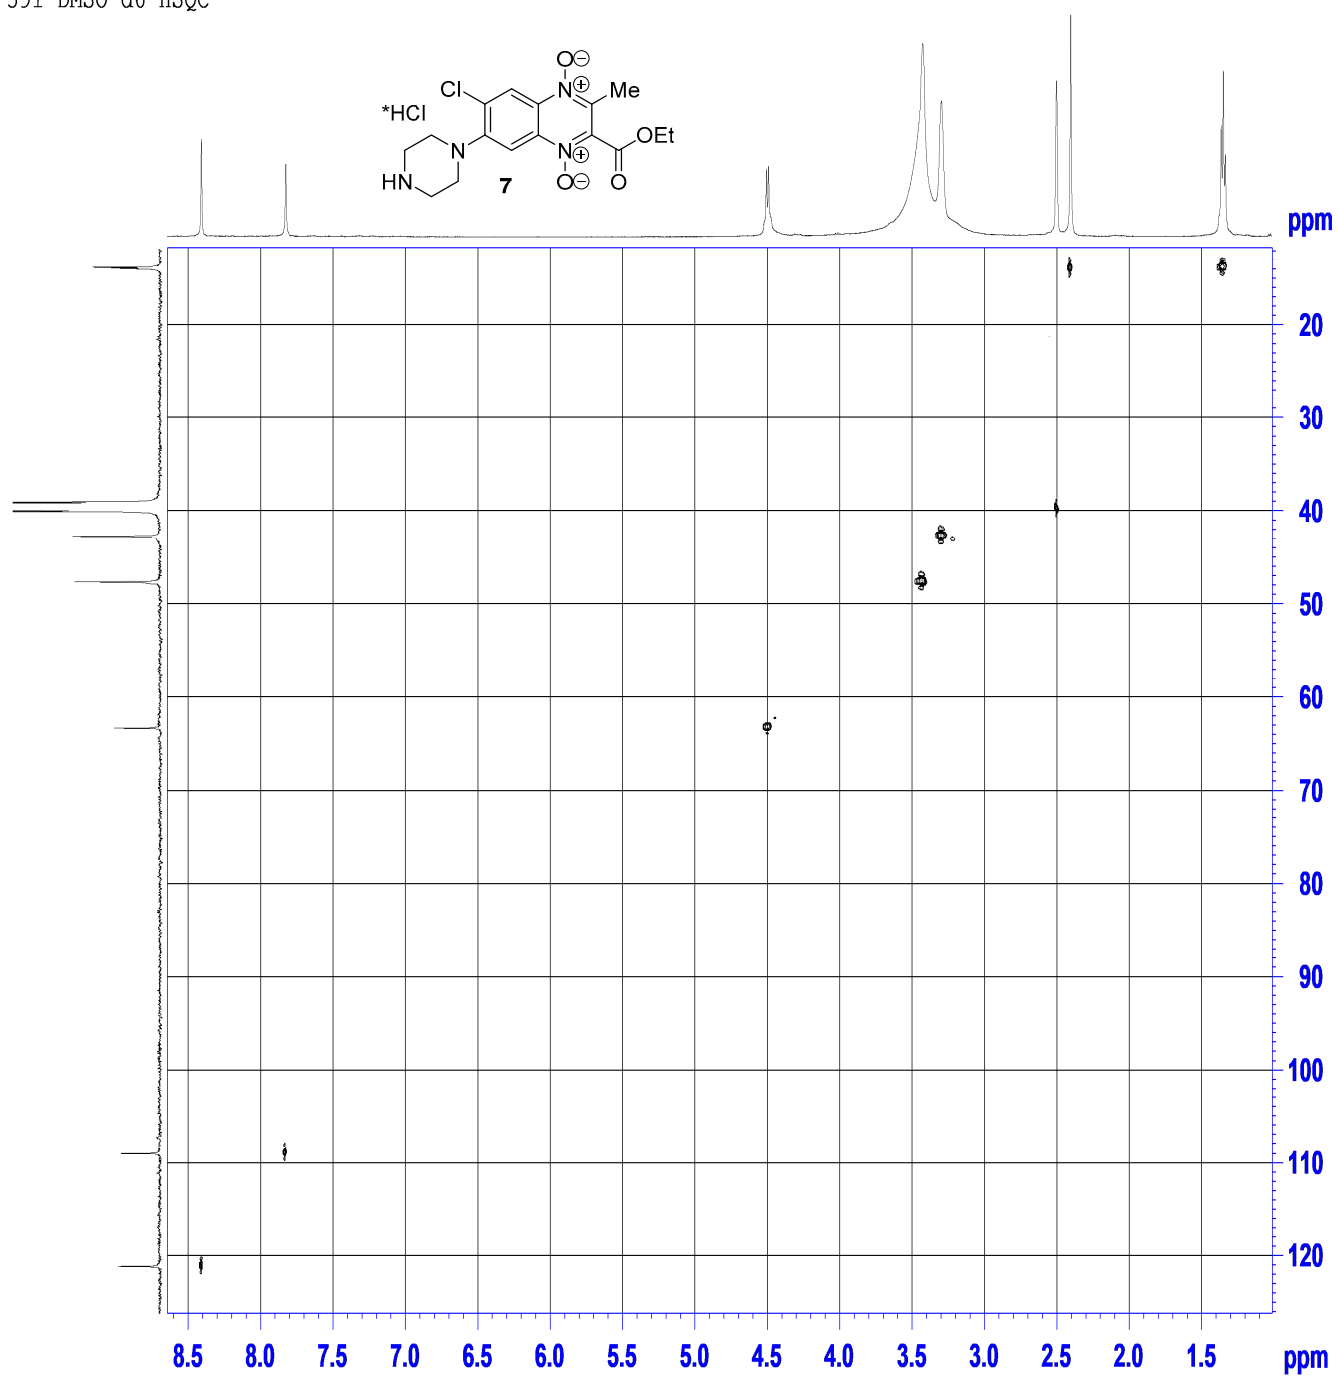

**Figure S35.** HMBC spectrum for compound **7**.

BG-391 DMSO-d6 HMBC

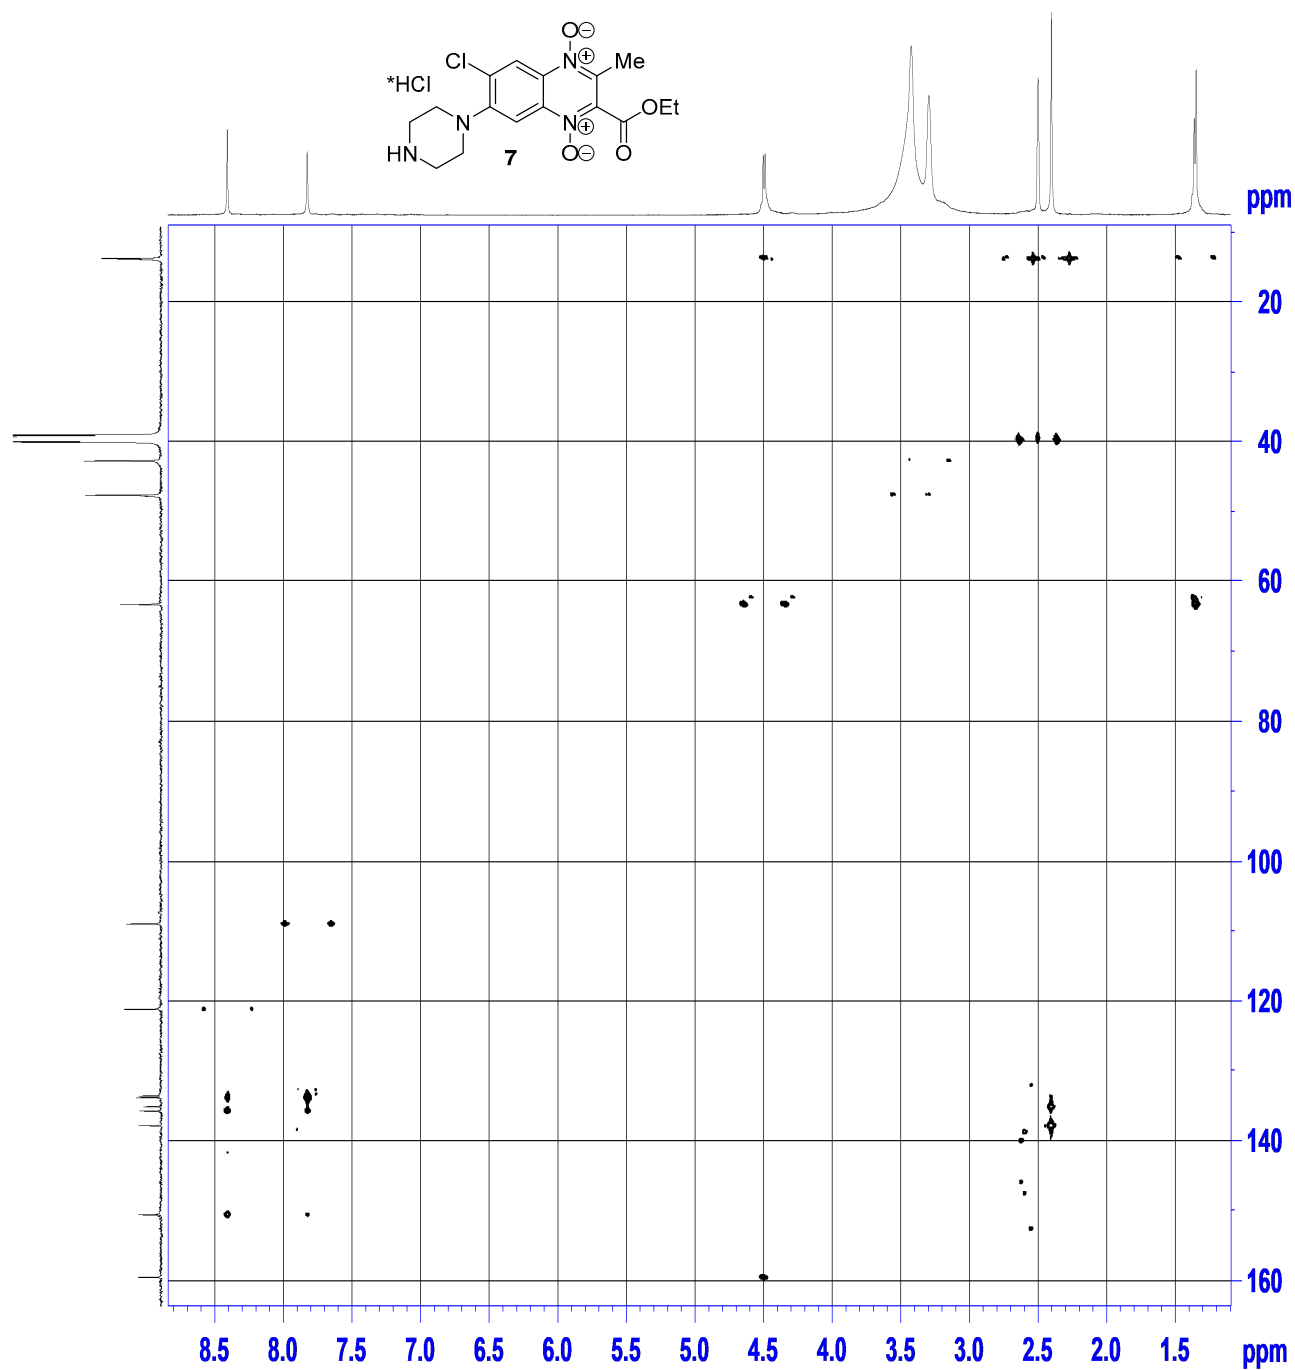

**Figure S36.** HMBC spectrum (fragment) for compound 7.

BG-391 DMSO-d6 HMBC

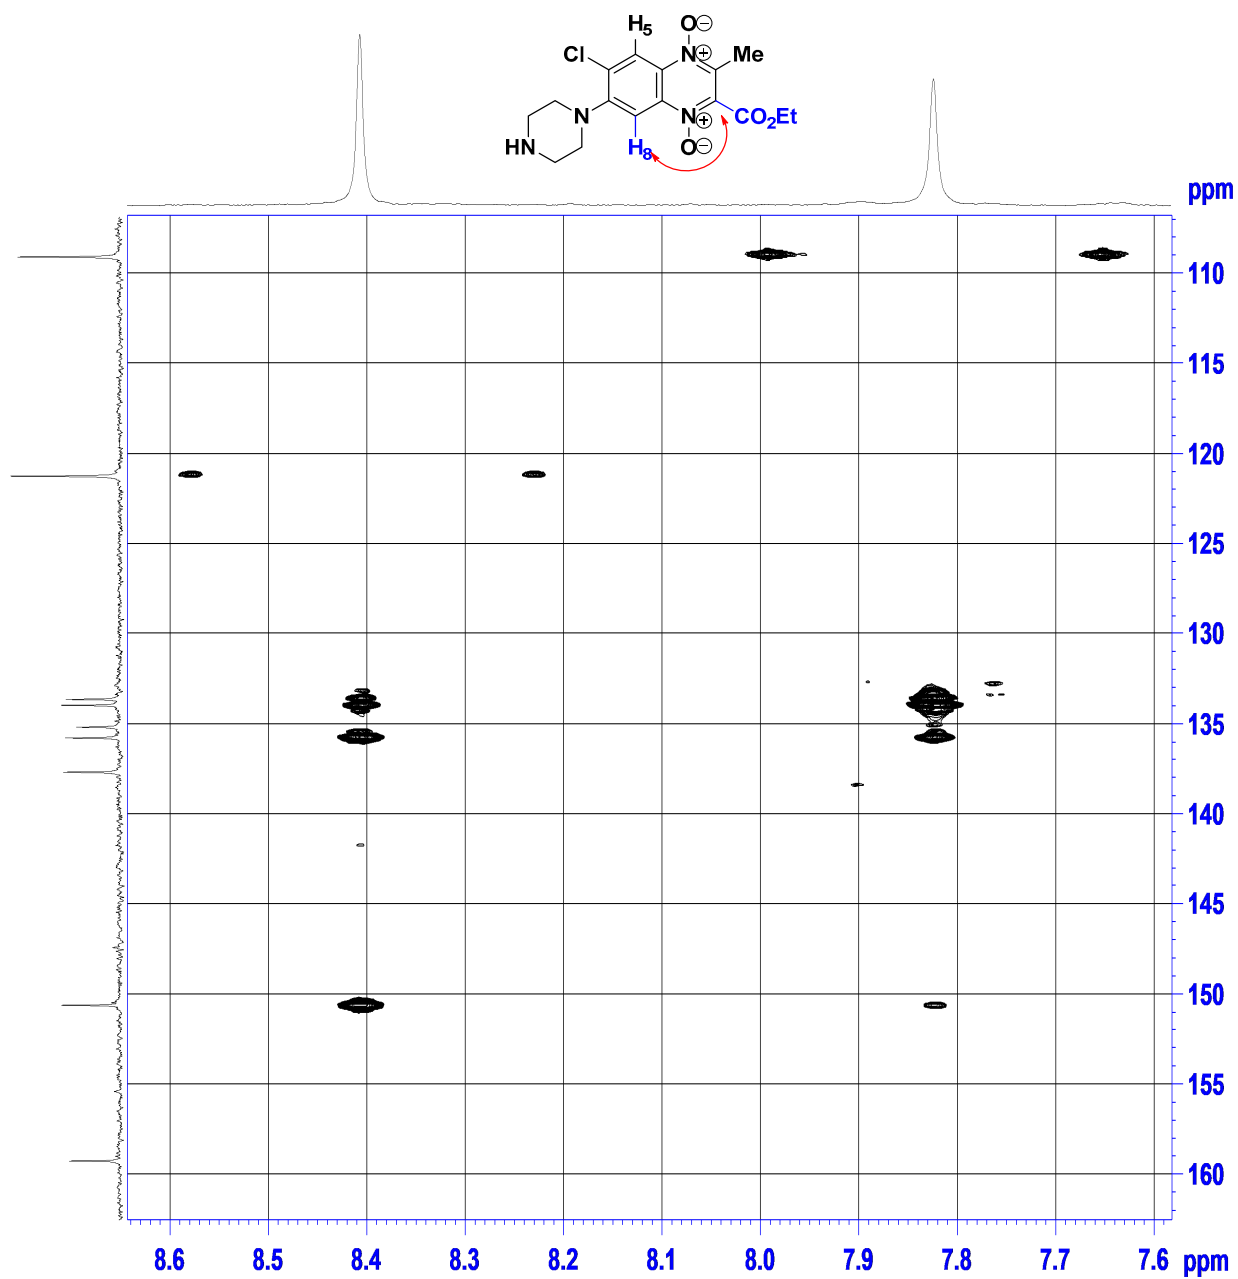

**Figure S37.**  $^1\text{H}$  2D NOESY spectrum of compound **7** in  $\text{DMSO-}d_6$  at 500 MHz.

BG-391 DMSO- $d_6$  NOESY,  $T_m=400\text{m}$

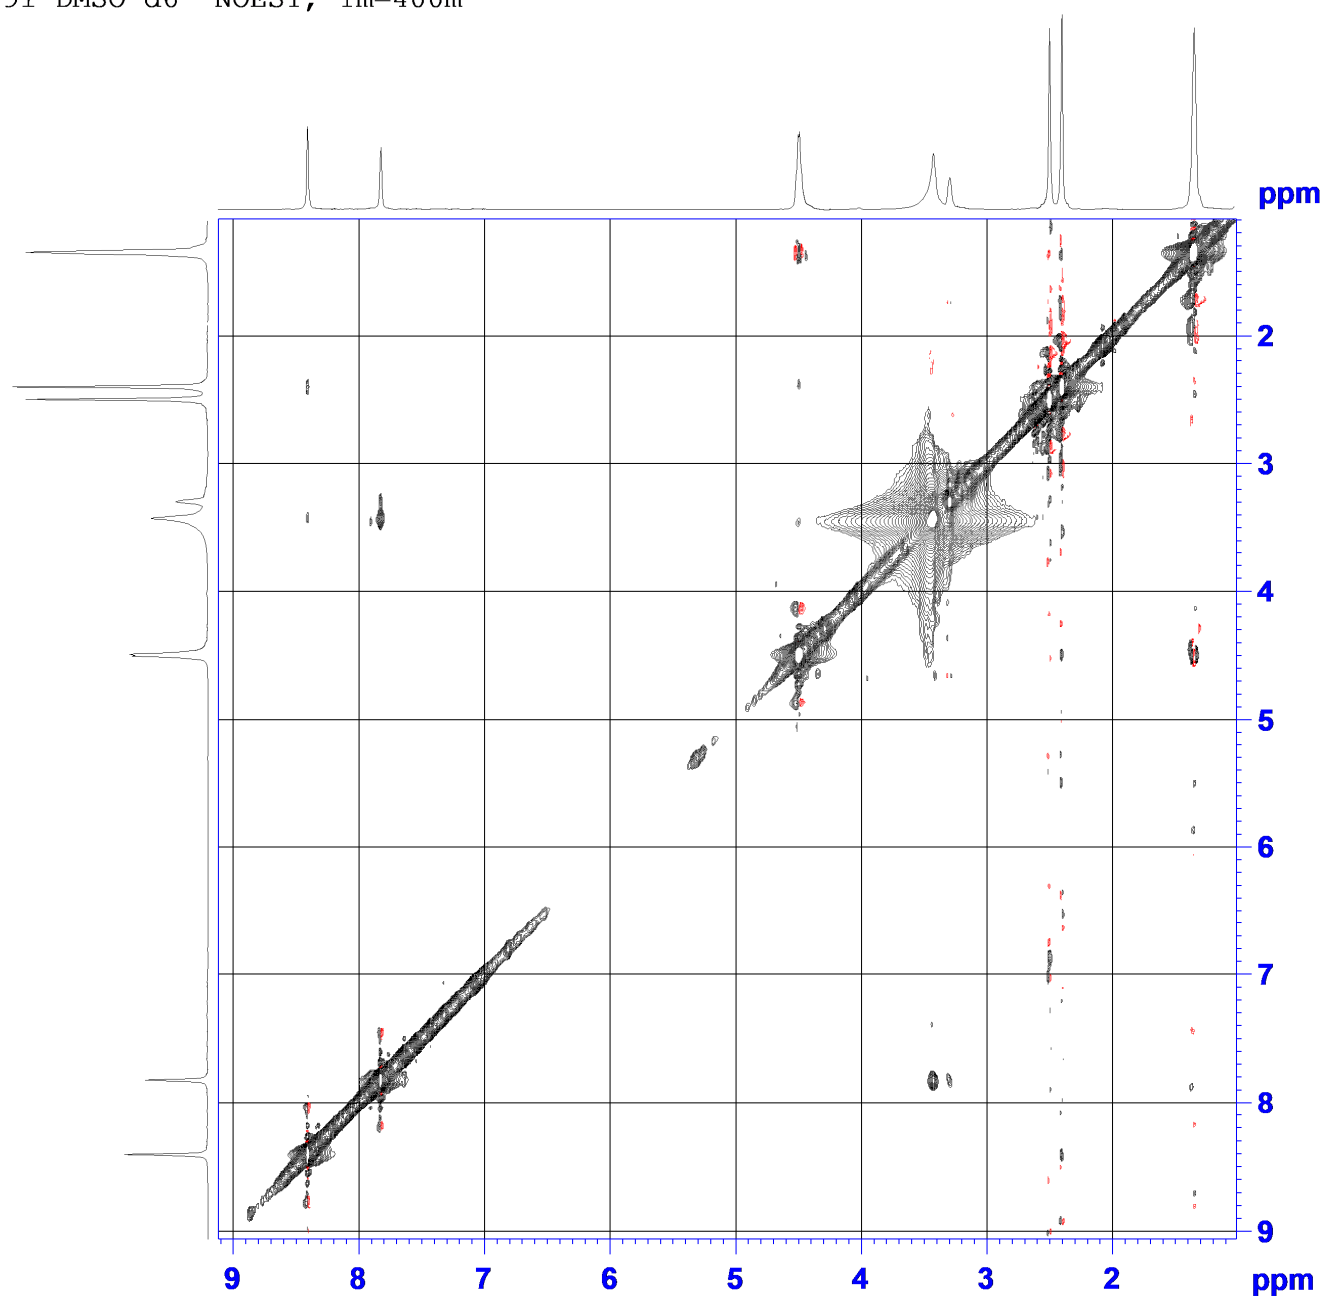

**Figure S38.** Selective NOE spectrum at CH<sub>3</sub> at 2.402 ppm for compound 7.

BG-391 DMSO-d<sub>6</sub> Te=25°C Sel. NOE at CH<sub>3</sub> at 2.402 ppm

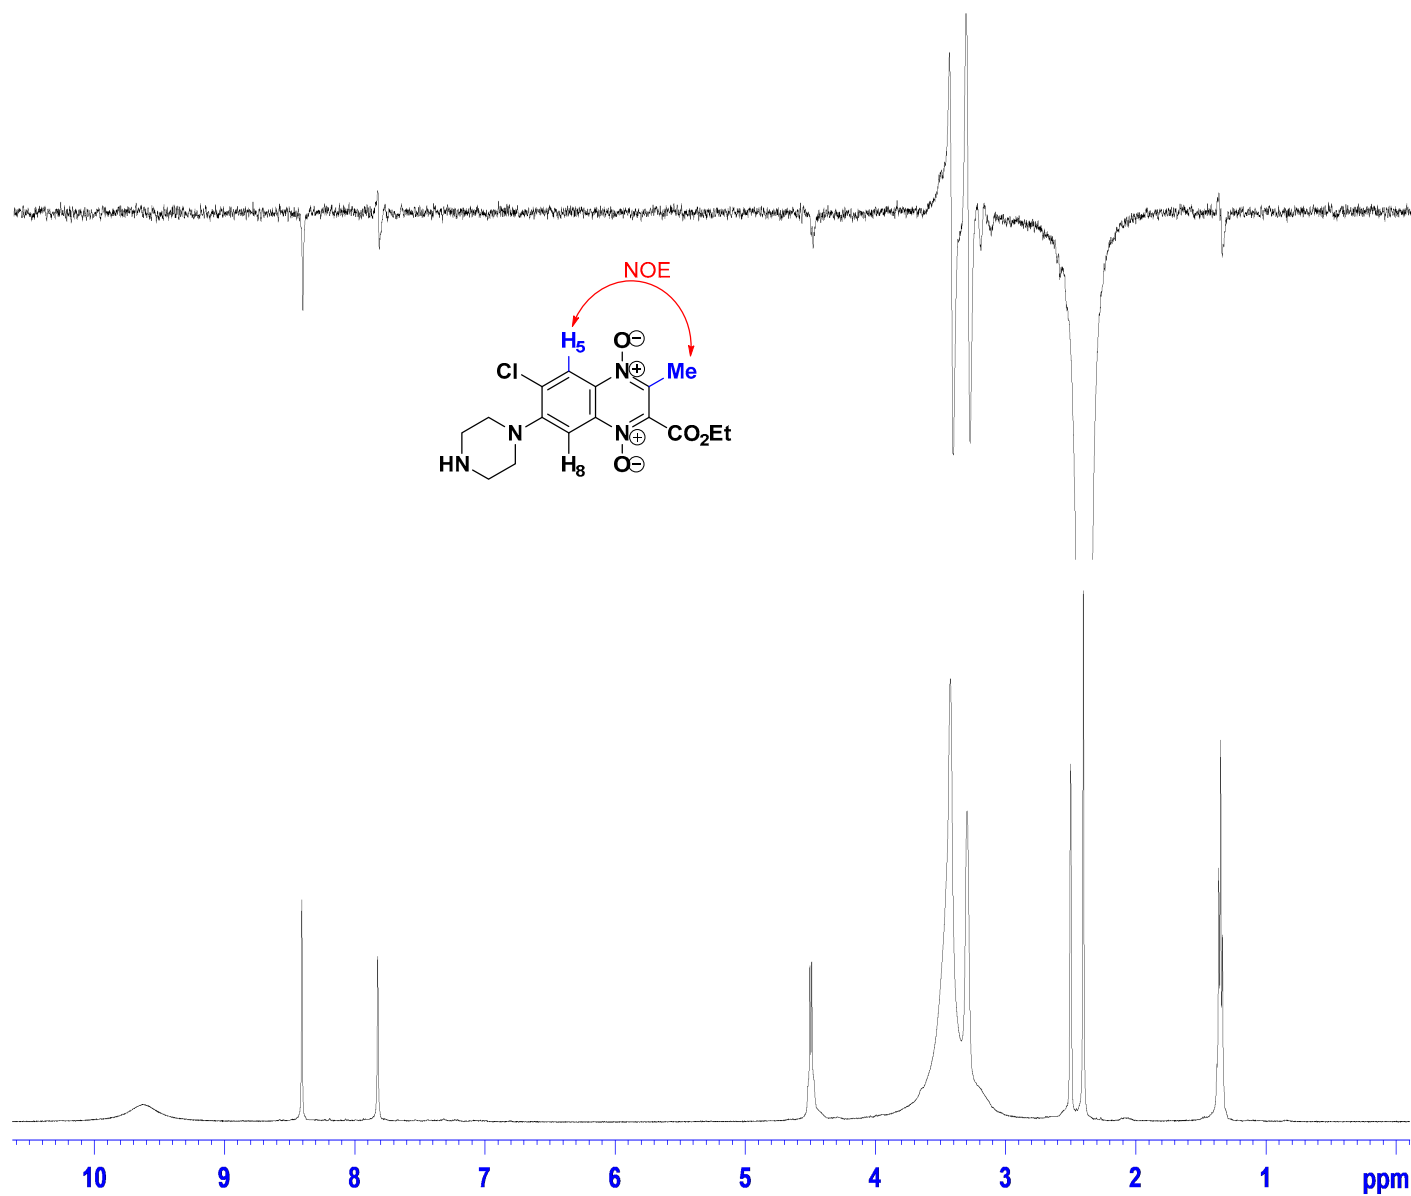

**Table S1.**  $^{13}\text{C}$  chemical shifts ( $\delta_{\text{C}}$ , ppm) and characteristic increments ( $I^{\text{C}}$ ) for the  $^{13}\text{C}$  chemical shift differences (relative to 2-ethoxycarbonyl-3-methylquinoxaline 1,4-dioxide) for the piperazine group for regioisomers **4** and **7**.

| Position | 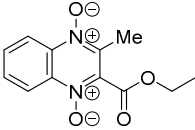 |  | $I^{\text{C}}$ |  | $I^{\text{C}}$ |
|----------|-----------------------------------------------------------------------------------|-----------------------------------------------------------------------------------|----------------|-------------------------------------------------------------------------------------|----------------|
|          | $\delta_{\text{C}}$                                                               | $\delta_{\text{C}}$                                                               |                | $\delta_{\text{C}}$                                                                 |                |
| C-2      | 134.8                                                                             | 134.1                                                                             | −0.7           | 135.2                                                                               | +0.4           |
| C-3      | 138.3                                                                             | 139.0                                                                             | +0.7           | 137.8                                                                               | −0.5           |
| C-9      | 137.4                                                                             | 132.3                                                                             | −5.1           | 135.8                                                                               | −1.6           |
| C-10     | 136.2                                                                             | 137.0                                                                             | +0.8           | 133.7                                                                               | −2.5           |



**Table S2.** Stability of aqueous solutions of derivatives **4-7** after 7 days storage at 37 °C.

| Compound                                                                                       | HPLC analysis (purity, %) |       |
|------------------------------------------------------------------------------------------------|---------------------------|-------|
|                                                                                                | 0 day                     | 7 day |
| 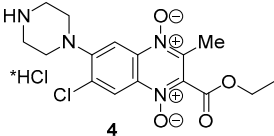<br><b>4</b>  | 95.9                      | 94.7  |
| <br><b>5</b>  | 95.0                      | 24.9  |
| <br><b>6</b>  | 99.7                      | 97.6  |
| <br><b>7</b> | 94.7                      | 84.9  |

>MSMEG\_4883  
 ATGAGCATATCGCTGCTGCTCGAGATGGCATCGTCGGGAGATCCCGACCGCACCGCGGTGGTTTCCGACG  
 ACACCCGGCTCACCAGGCGAGTTGAGCACATTGGCCGACGGGGCAGCAGGCGTCATCGCCGGGTCAGG  
 CGCGGCACACGTGCCTACGTGGGTACCGGTGGCG**CGCTGCTGCCGCTGCTGCT**GTTTCGCCTCGGCACGC  
 GCGGCGATCCCCTTCACCCCCCTGAACTACCGTCTCAGCGCCGAAGGTCTGCGCGAGCTGGTCGACCGGT  
 TGCCACACCGCTGGTGATCGCCGACGGCGAGTACGCCGGCATGCTCGCCGGAGCGGGCAGGCCGGTGCT  
 CACCTCCGAGGAGTTCCTGTCCCAGGCCCCGACGGCCGATCCGGCCGCAGAGTTCGCCGACCCCGACGCG  
 GTCGCGGTGGTGCTGTTACCTCGGGCACCACATCGCGCCCCAAGGCCGTGAACTCACCCACAACAACC  
 TCACGAGCTACATCACCGGGACCGTCGAATTCGGTTCGGCCGCACCGGAGGACGCCGCGCTGATCTGTGT  
 GCCGCCGTACCACATCGCGGGTGTCAGCGCGGCGATGTCCAACCTGTACGCCGGCCGGAAGATGGTGTAC  
 CTGCGCAACTTCGACGCACACCGCTGGGTGAGTTGGTGCGCACCGAGGGCGTCACGTCTGCCACCGTGG  
 TGCCGACCATGCTCGACCGTATCGTCACCGCACTTGAGACCACGCGCGCCGAGCTGCCGACCCTGCGCAA  
 CCTCGCCTACGGCGGATCCAAGGTCGCGCTGCCCCTGGTCCGCAAGGCGCTGGAGCTGATGCCGAACGTC  
 GGATTCGTCAACGCCTACGGTCTCACCGAAACCAGCTCCACCATCGCGGTCTTCGGACCCGACGACCACC  
 GGGCCGCGCTGGCCTCCGACGACCCCGGTGTGACCCGCCGCCTCGGGTCGGTGGGACAGGTGGTGCCCGG  
 GATCGAGGTGCAGATCCGCGGCGAGGACGGCACCGTGCTGGGGCCCGGCGAGACCGGTGAGCTGTTCTGTG  
 CGCGGCGAGCAGGTGTCCGGCCGGTACACCGAGATCGGGTCGGTGCTCGACGAGGACGGCTGGTTCCCCA  
 CCAAAGACGTTGCGATGCTTGACCAGGACGGCTATCTGTTTCATCGGCGGCCGGTCGGACGACACCATCAT  
 CCGCGGCGGCGAGAACATCGTCTCCGCGGAGATCGAGGACGTTCTCGTGGAACATCCCGACGTGCGCGAC  
 GTCGCGGTGGTCGGCCCCGAGGACCCCGAGTGGGGCCAGATCATCGTCGCGGTCTGTGGTGCCCGCCGACG  
 GCGCCGAACCCGACGCCGACGTACTCCGCGAGCACGTCCGCAAACACCTGCGCGGATCCCGCACCCCGA  
 CCGCGTGGTCTTCCGCGCCGAACTGCCCACCAACGCCACCGGCAAGGTGCTGCGCCGTCAACTCGTCGAC  
 GAACTCCAGCCCATCTCGTAG

**Figure S39.** Nucleotide sequence of MSMEG\_4883. The 9 bp repeats are underlined, while the deletion region is highlighted as bold.

**Table S3.** Unique SNPs in quinoxaline-resistant *M. smegmatis* mutants.

| <i>M. smegmatis qdr1</i> |             |                                                       |                     |         |                         |
|--------------------------|-------------|-------------------------------------------------------|---------------------|---------|-------------------------|
| <i>Locus tag</i>         | Protein ID  | annotation                                            | Codon               | SNP     | Amino acid substitution |
| <i>MSMEG_0210</i>        | YP_884625.1 | LprO protein                                          | codon=45            | CTG>CTT | L>L                     |
| <i>MSMEG_0210</i>        | YP_884625.1 | LprO protein                                          | codon=45            | CTG>CCG | L>P                     |
| <i>MSMEG_0229</i>        | YP_884644.1 | dihydroxy-acid dehydratase                            | codon=38            | ATG>ATT | M>I                     |
| <i>MSMEG_0232</i>        | YP_884647.1 | sugar transporter family protein                      | codon=349           | GGC>GAC | G>D                     |
| <i>MSMEG_0234</i>        | YP_884649.1 | metallopeptidase                                      | codon=158           | CTG>CCG | L>P                     |
| <i>MSMEG_0318</i>        | YP_884733.1 | AMP-dependent synthetase/ligase                       | codon=23            | CCT>CCA | P>P                     |
| <i>MSMEG_0613</i>        | YP_885024.1 | hypothetical protein                                  | codon=148           | ATG>ACG | M>T                     |
| <i>MSMEG_0705</i>        | YP_885112.1 | permease of the major facilitator superfamily protein | codon=119           | CTG>CGG | L>R                     |
| <i>MSMEG_0706</i>        | YP_885113.1 | 4-carboxy-4-hydroxy-2-oxoadipate aldolase             | codon=38            | GGC>AGC | G>S                     |
| <i>MSMEG_1240</i>        | YP_885631.1 | hypothetical protein                                  | codon=253           | CAT>CGT | H>R                     |
| <i>MSMEG_1328</i>        | YP_885718.1 | exodeoxyribonuclease V subunit gamma                  | codon=236           | ACT>GCT | T>A                     |
| <i>MSMEG_1380</i>        | YP_885766.1 | transcriptional regulator                             | -                   | -       | -                       |
| <i>MSMEG_1684</i>        | YP_886060.1 | hypothetical protein                                  | codon=207           | GAG>CAG | E>Q                     |
| <i>MSMEG_1775</i>        | YP_886147.1 | cytochrome P450 monooxygenase                         | Intergenic mutation |         |                         |
| <i>MSMEG_1930</i>        | YP_886296.1 | DEAD/DEAH box helicase                                | Intergenic mutation |         |                         |
| <i>MSMEG_2257</i>        | YP_886609.1 | cytochrome P450-terp                                  | codon=394           | GCC>GGC | A>G                     |
| <i>MSMEG_4378</i>        | YP_888653.1 | two-component system response regulator               | codon=109           | GTG>GGG | V>G                     |
| <i>MSMEG_4648</i>        | YP_888911.1 | DNA-binding protein                                   | codon=49            | CAG>CCG | Q>P                     |
| <i>MSMEG_4702</i>        | YP_888963.1 | ABC transporter permease                              | codon=73            | GCG>GGG | A>G                     |
| <i>MSMEG_4712</i>        | YP_888972.1 | pyruvate dehydrogenase E1 component subunit alpha     | codon=160           | CAG>CGG | Q>R                     |
| <i>MSMEG_4846</i>        | YP_889102.1 | enoyl-CoA hydratase                                   | Intergenic mutation |         |                         |
| <i>MSMEG_4861</i>        | YP_889117.1 | cyclase                                               | Intergenic mutation |         |                         |
| <i>MSMEG_5122</i>        | YP_889369.1 | ferredoxin                                            | Intergenic          |         |                         |

|                   |             |                                       |            |                     |     |
|-------------------|-------------|---------------------------------------|------------|---------------------|-----|
|                   |             |                                       | mutation   |                     |     |
|                   |             |                                       | Intergenic |                     |     |
|                   |             |                                       | mutation   |                     |     |
| <i>MSMEG_5122</i> | YP_889369.1 | ferredoxin                            |            |                     |     |
| <i>MSMEG_5348</i> | YP_889592.1 | medium-chain fatty acid-CoA ligase    | codon=254  | CCC>CGC             | P>R |
| <i>MSMEG_5351</i> | YP_889595.1 | hypothetical protein                  | codon=43   | GCG>GGG             | A>G |
| <i>MSMEG_5437</i> | YP_889676.1 | serine/threonine protein kinase       | codon=272  | CAT>TAT             | H>Y |
| <i>MSMEG_5600</i> | YP_889834.1 | hypothetical protein                  |            | Intergenic mutation |     |
| <i>MSMEG_5757</i> |             | tRNA-Glu                              | codon=22   | GTT>GCT             | V>A |
| <i>MSMEG_6041</i> | YP_890265.1 | acyl-CoA dehydrogenase                | codon=281  | ATC>GTC             | I>V |
| <i>MSMEG_6232</i> | YP_890451.1 | catalase KatA                         | codon=115  | GGG>CGG             | G>R |
| <i>MSMEG_6241</i> | YP_890460.1 | ATPase AAA                            | codon=194  | GTG>GCG             | V>A |
| <i>MSMEG_6317</i> | YP_890535.1 | lipolytic protein G-D-S-L             | codon=132  | CCC>CCA             | P>P |
| <i>MSMEG_6628</i> | YP_890837.1 | TetR family transcriptional regulator |            | Intergenic mutation |     |
| <i>MSMEG_6858</i> | YP_891062.1 | epoxide hydrolase 1                   | codon=163  | TCG>TTG             | S>L |

*M. smegmatis qdr2*

| <i>Locus tag</i>  | Protein ID  | annotation                                  | Codon     | SNP                 | Amino acid substitution |
|-------------------|-------------|---------------------------------------------|-----------|---------------------|-------------------------|
| <i>MSMEG_0001</i> | YP_884424.1 | DNA polymerase III subunit beta             | codon=152 | GCG>GGG             | A>G                     |
| <i>MSMEG_0312</i> | YP_884726.1 | 2-dehydro-3-deoxy-phosphogluconate aldolase | codon=99  | ATG>ACG             | M>T                     |
| <i>MSMEG_0576</i> | YP_884987.1 | MmpL4 protein                               | codon=377 | GTG>GTT             | V>V                     |
| <i>MSMEG_0634</i> | YP_885043.1 | PAP2 superfamily protein                    | codon=37  | GAC>GGC             | D>G                     |
| <i>MSMEG_0660</i> | YP_885069.1 | extracellular solute-binding protein        | codon=158 | TTG>TTA             | L>L                     |
| <i>MSMEG_0719</i> | YP_885126.1 | flavoheomprotein                            | codon=175 | CAG>CGG             | Q>R                     |
| <i>MSMEG_1080</i> | YP_885476.1 | large subunit of N,N-dimethylformamidase    | codon=490 | ACA>ACG             | T>T                     |
| <i>MSMEG_1111</i> | YP_885505.1 | hypothetical protein                        | codon=6   | GCC>GGC             | A>G                     |
| <i>MSMEG_1119</i> | YP_885513.1 | glutamine amidotransferase                  | codon=114 | CGA>AGA             | R>R                     |
| <i>MSMEG_1211</i> | YP_885603.1 | Fatty acid desaturase                       |           | Intergenic mutation |                         |
| <i>MSMEG_1380</i> | YP_885766.1 | transcriptional regulator                   | -         | -                   | -                       |
|                   |             | signal peptide peptidase SppA, 67K type     |           |                     |                         |
| <i>MSMEG_1476</i> | YP_885858.1 |                                             | codon=232 | GAG>GGG             | E>G                     |

|                   |             |                                         |                     |         |     |
|-------------------|-------------|-----------------------------------------|---------------------|---------|-----|
| <i>MSMEG_1476</i> | YP_885858.1 | signal peptide peptidase SppA, 67K type | codon=420           | AAA>AAC | K>N |
| <i>MSMEG_1641</i> | YP_886018.1 | hypothetical protein                    | codon=181           | GCC>GCT | A>A |
| <i>MSMEG_1644</i> | YP_886021.1 | hypothetical protein                    | codon=247           | GTG>ATG | V>M |
| <i>MSMEG_2077</i> | YP_886438.1 | acyl-CoA dehydrogenase                  | codon=145           | GTC>CTC | V>L |
| <i>MSMEG_2512</i> | YP_886850.1 | lactate 2-monooxygenase                 | codon=241           | ACC>ACG | T>T |
| <i>MSMEG_2968</i> | YP_887287.1 | hypothetical protein                    | codon=144           | AAC>AAT | N>N |
| <i>MSMEG_3159</i> | YP_887474.1 | methylmalonyl-CoA mutase                | codon=28            | CCC>CCG | P>P |
| <i>MSMEG_3975</i> | YP_888263.1 | regulatory protein                      | codon=396           | GAG>GAC | E>D |
| <i>MSMEG_4044</i> | YP_888330.1 | GAF domain-containing protein           | codon=467           | CAG>CGG | Q>R |
| <i>MSMEG_4723</i> | YP_888983.1 | hypothetical protein                    | codon=365           | GTG>GCG | V>A |
| <i>MSMEG_4853</i> | YP_889109.1 | peptidase, M24 family protein           | codon=10            | CGG>CGC | R>R |
| <i>MSMEG_4872</i> | YP_889128.1 | short chain dehydrogenase               | Intergenic mutation |         |     |
| <i>MSMEG_5122</i> | YP_889369.1 | ferredoxin                              | codon=5             | ATT>ACT | I>T |
| <i>MSMEG_5122</i> | YP_889369.1 | ferredoxin                              | codon=29            | CAT>TAT | H>Y |
| <i>MSMEG_5152</i> | YP_889397.1 | hypothetical protein                    | codon=29            | CAT>TAT | H>Y |
| <i>MSMEG_5423</i> | YP_889663.1 | transcription-repair coupling factor    | codon=906           | ATC>ATT | I>I |
| <i>MSMEG_5619</i> | YP_889853.1 | acyl-CoA dehydrogenase                  | codon=166           | GAC>GGC | D>G |
| <i>MSMEG_5656</i> | YP_889889.1 | histidinol dehydrogenase                | codon=422           | GCC>GCT | A>A |
| <i>MSMEG_6313</i> | YP_890531.1 | queuine tRNA-ribosyltransferase         | codon=349           | ACG>CCG | T>P |
| <i>MSMEG_6341</i> | YP_890558.1 | 6-phosphogluconate dehydrogenase        | codon=190           | GTG>GTC | V>V |

*M. smegmatis qdr3*

| <i>Locus tag</i>  | Protein ID  | annotation                            | Codon     | SNP     | Amino acid substitution |
|-------------------|-------------|---------------------------------------|-----------|---------|-------------------------|
| <i>MSMEG_0017</i> | YP_884437.1 | ABC transporter permease              | codon=535 | AGT>CGT | S>R                     |
| <i>MSMEG_1186</i> | YP_885578.1 | permease                              | codon=431 | ATC>CTC | I>L                     |
| <i>MSMEG_1325</i> | YP_885716.1 | exodeoxyribonuclease V subunit alpha  | codon=419 | GAA>AAA | E>K                     |
| <i>MSMEG_1380</i> | YP_885766.1 | transcriptional regulator             | codon=54  | TAC>TCC | Y>S                     |
| <i>MSMEG_1469</i> | YP_885851.1 | 30S ribosomal protein S8              | codon=58  | AAG>ACG | K>T                     |
| <i>MSMEG_1515</i> | YP_885897.1 | two-component sensor histidine kinase | codon=137 | GGC>GAC | G>D                     |
| <i>MSMEG_2115</i> | YP_886471.1 | hypothetical protein                  | codon=95  | GAC>TAC | D>Y                     |

|                   |             |                                                                           |                     |         |     |
|-------------------|-------------|---------------------------------------------------------------------------|---------------------|---------|-----|
| <i>MSMEG_2115</i> | YP_886471.1 | hypothetical protein                                                      | codon=95            | GAC>GCC | D>A |
| <i>MSMEG_2139</i> | YP_886496.1 | hypothetical protein                                                      | Intergenic mutation |         |     |
| <i>MSMEG_2350</i> | YP_886693.1 | hypothetical protein                                                      | codon=223           | CTC>CCC | L>P |
| <i>MSMEG_2580</i> | YP_886917.1 | 4-hydroxy-3-methylbut-2-en-1-yl<br>diphosphate synthase                   | codon=69            | GTG>GTA | V>V |
| <i>MSMEG_2907</i> | YP_887226.1 | oxidoreductase YeiQ                                                       | codon=443           | GTC>CTC | V>L |
| <i>MSMEG_2950</i> | YP_887269.1 | carbon monoxide dehydrogenase,<br>medium chain                            | codon=5             | CGG>GGG | R>G |
| <i>MSMEG_3673</i> | YP_887976.1 | 4-alpha-glucanotransferase                                                | codon=272           | GTG>GTA | V>V |
| <i>MSMEG_3741</i> | YP_888040.1 | transcriptional regulator                                                 | codon=153           | AAA>AAG | K>K |
| <i>MSMEG_4108</i> | YP_888390.1 | NAD(P) transhydrogenase subunit beta                                      | codon=370           | CTG>CTC | L>L |
| <i>MSMEG_4109</i> | YP_888391.1 | NAD(P) transhydrogenase subunit<br>alpha                                  | codon=408           | GGA>GCA | G>A |
| <i>MSMEG_4259</i> | YP_888535.1 | hypothetical protein                                                      | codon=280           | CTG>CCG | L>P |
| <i>MSMEG_4383</i> | YP_888658.1 | MmpL5 protein                                                             | codon=66            | GTG>GGG | V>G |
| <i>MSMEG_4384</i> | YP_888659.1 | penicillin binding protein<br>transpeptidase domain-containing<br>protein | codon=41            | GTG>GTA | V>V |
| <i>MSMEG_4477</i> | YP_888750.1 | hydrolase, alpha/beta hydrolase fold<br>family protein                    | codon=236           | CTC>CTG | L>L |
| <i>MSMEG_4641</i> | YP_888903.1 | salicylate hydroxylase                                                    | codon=234           | CGC>CCC | R>P |
| <i>MSMEG_4646</i> | YP_888909.1 | pyruvate synthase                                                         | codon=652           | TGA>TCA | *>S |
| <i>MSMEG_4917</i> | YP_889173.1 | hypothetical protein                                                      | codon=73            | GCC>TCC | A>S |
| <i>MSMEG_5585</i> | YP_889821.1 | hypothetical protein                                                      | codon=39            | GCC>GGC | A>G |
| <i>MSMEG_6749</i> | YP_890957.1 | hypothetical protein                                                      | codon=11            | AAG>AGG | K>R |
| <i>MSMEG_6934</i> | YP_891128.1 | thioredoxin                                                               | codon=90            | GTG>GGG | V>G |

*M. smegmatis qdr4*

| <i>Locus tag</i>  | Protein ID  | annotation                            | Codon               | SNP     | Amino acid<br>substitution |
|-------------------|-------------|---------------------------------------|---------------------|---------|----------------------------|
| <i>MSMEG_0166</i> | YP_884582.1 | GntR family transcriptional regulator | Intergenic mutation |         |                            |
| <i>MSMEG_0204</i> | YP_884619.1 | hypothetical protein                  | codon=610           | GCG>GTG | A>V                        |
| <i>MSMEG_0217</i> | YP_884632.1 | alcohol dehydrogenase                 | Intergenic mutation |         |                            |

|                   |             |                                                                      |                     |                     |     |
|-------------------|-------------|----------------------------------------------------------------------|---------------------|---------------------|-----|
| <i>MSMEG_0635</i> | YP_885045.1 | hypothetical protein                                                 | codon=93            | ACC>AAC             | T>N |
|                   |             | glutamyl-tRNA(Gln)/aspartyl-tRNA(Asn) amidotransferase subunit alpha |                     | Intergenic mutation |     |
| <i>MSMEG_1088</i> | YP_885483.1 |                                                                      |                     |                     |     |
| <i>MSMEG_1915</i> | YP_886281.1 | anti-sigma factor, family protein                                    | codon=55            | TGC>TGG             | C>W |
| <i>MSMEG_2401</i> | YP_886740.1 | hypothetical protein                                                 | codon=170           | CCG>GCG             | P>A |
| <i>MSMEG_2531</i> | YP_886868.1 | GntR family transcriptional regulator                                |                     | Intergenic mutation |     |
| <i>MSMEG_3598</i> | YP_887901.1 | periplasmic sugar-binding proteins                                   | codon=253           | GAC>GTC             | D>V |
| <i>MSMEG_3878</i> | YP_888169.1 | precorrin-6Y C5,15-methyltransferase                                 | codon=343           | GCG>GCC             | A>A |
| <i>MSMEG_4147</i> | YP_888427.1 | major facilitator superfamily protein                                | codon=8             | GTC>TTC             | V>F |
|                   |             |                                                                      | Intergenic mutation |                     |     |
| <i>MSMEG_4290</i> | YP_888567.1 | glutamine synthetase                                                 |                     |                     |     |
| <i>MSMEG_4646</i> | YP_888909.1 | pyruvate synthase                                                    | codon=95            | AAC>CAC             | N>H |
| <i>MSMEG_5117</i> | YP_889365.1 | proline dehydrogenase                                                | codon=184           | GAG>CAG             | E>Q |
| <i>MSMEG_5311</i> | YP_889557.1 | hypothetical protein                                                 | codon=133           | GCG>TCG             | A>S |
|                   |             | phosphoribosylaminoimidazole synthetase                              |                     |                     |     |
| <i>MSMEG_5798</i> | YP_890026.1 |                                                                      | codon=336           | TGG>CGG             | W>R |
| <i>MSMEG_5836</i> | YP_890063.1 | hypothetical protein                                                 | codon=141           | CAC>TAC             | H>Y |
| <i>MSMEG_6636</i> | YP_890845.1 | [Mn] superoxide dismutase                                            |                     | Intergenic mutation |     |

*M. smegmatis qdr5*

| <i>Locus tag</i>  | Protein ID  | annotation                                 | Codon     | SNP                 | Amino acid substitution |
|-------------------|-------------|--------------------------------------------|-----------|---------------------|-------------------------|
| <i>MSMEG_0070</i> | YP_884488.1 | hypothetical protein                       |           | Intergenic mutation |                         |
| <i>MSMEG_0125</i> | YP_884540.1 | integral membrane protein                  | codon=190 | TCG>CCG             | S>P                     |
| <i>MSMEG_0144</i> | YP_884561.1 | HNH endonuclease                           | codon=417 | GAC>GTC             | D>V                     |
| <i>MSMEG_0354</i> | YP_884767.1 | hypothetical protein                       | codon=104 | GCA>CCA             | A>P                     |
| <i>MSMEG_0516</i> | YP_884928.1 | sugar transporter                          | codon=176 | ATC>ATG             | I>M                     |
| <i>MSMEG_0772</i> | YP_885178.1 | phytase                                    |           | Intergenic mutation |                         |
| <i>MSMEG_1380</i> | YP_885766.1 | transcriptional regulator                  | codon=108 | GGA>TGA             | G>*                     |
| <i>MSMEG_1559</i> | YP_885939.1 | phosphoglucosamine mutase                  | codon=148 | CGG>CCG             | R>P                     |
|                   |             | HNH endonuclease domain-containing protein |           |                     |                         |
| <i>MSMEG_2148</i> | YP_886504.1 |                                            |           | Intergenic mutation |                         |

|                   |             |                                                                            |                     |         |     |
|-------------------|-------------|----------------------------------------------------------------------------|---------------------|---------|-----|
| <i>MSMEG_2349</i> | YP_886692.1 | glycosyl hydrolase family protein                                          | codon=85            | ATG>GTG | M>V |
| <i>MSMEG_2377</i> | YP_886719.1 | P49 protein                                                                | codon=178           | GTT>TTT | V>F |
| <i>MSMEG_3143</i> | YP_887458.1 | aconitate hydratase                                                        | codon=835           | GGC>GGG | G>G |
| <i>MSMEG_3183</i> | YP_887498.1 | threonine dehydratase                                                      | codon=2             | ACC>GCC | T>A |
| <i>MSMEG_3281</i> | YP_887592.1 | spermidine/putrescine ABC transporter<br>ATP-binding protein               | codon=184           | GGC>GGA | G>G |
| <i>MSMEG_3815</i> | YP_888107.1 | drug efflux membrane protein                                               | codon=29            | GCC>GGC | A>G |
| <i>MSMEG_3839</i> | YP_888130.1 | DNA polymerase I                                                           | codon=242           | GGC>TGC | G>C |
| <i>MSMEG_3872</i> | YP_888163.1 | precorrin-8X methylmutase                                                  | codon=44            | GGC>GGA | G>G |
| <i>MSMEG_4516</i> | YP_888788.1 | 2,3-dihydroxybenzoate-AMP ligase                                           | codon=359           | CTG>CTC | L>L |
| <i>MSMEG_4646</i> | YP_888909.1 | pyruvate synthase                                                          | codon=274           | CCG>CTG | P>L |
| <i>MSMEG_4721</i> | YP_888981.1 | permease of the major facilitator<br>superfamily protein                   | codon=114           | GTG>GGG | V>G |
| <i>MSMEG_4762</i> | YP_889019.1 | ABC transporter                                                            | codon=112           | TCG>TTG | S>L |
| <i>MSMEG_4793</i> | YP_889049.1 | virulence factor Mce family protein<br>tetracycline-resistance determinant | codon=69            | GTT>GTC | V>V |
| <i>MSMEG_5187</i> | YP_889433.1 | TetV                                                                       | codon=82            | AAC>AAG | N>K |
| <i>MSMEG_5253</i> | YP_889499.1 | hypothetical protein                                                       | codon=2             | ACC>ATC | T>I |
| <i>MSMEG_5450</i> | YP_889689.1 | redox-sensitive transcriptional activator<br>SoxR                          | codon=46            | CTG>GTG | L>V |
| <i>MSMEG_5589</i> | YP_889824.1 | manganese transporter MntH                                                 | codon=344           | GCC>GAC | A>D |
| <i>MSMEG_5595</i> | YP_889830.1 | MarR family transcriptional regulator<br>major facilitator family protein  | Intergenic mutation |         |     |
| <i>MSMEG_5713</i> | YP_889945.1 | transporter                                                                | codon=278           | GGT>GTT | G>V |
| <i>MSMEG_5876</i> | YP_890101.1 | H-N-H endonuclease F-TfIIIV                                                | codon=107           | GCC>TCC | A>S |
| <i>MSMEG_6646</i> | YP_890855.1 | methylisocitrate lyase                                                     | codon=31            | CCG>TCG | P>S |
| <i>MSMEG_6708</i> | YP_890916.1 | epoxide hydrolase                                                          | codon=217           | GCC>TCC | A>S |
| <i>MSMEG_6947</i> | YP_891139.1 | chromosomal replication initiation<br>protein                              | codon=232           | AAG>AAT | K>N |

\* All Functionally annotated by BLAST search.



**Table S4.** Results of Dunnett's multiple comparison test for in vivo testing of lcta-3368.

| Dunnett's multiple comparisons test | Mean Diff. | 95.00% CI of diff.  | Significant? | Summary | Adjusted P Value |
|-------------------------------------|------------|---------------------|--------------|---------|------------------|
| RIF 10 vs. Solvent control          | -0.2508    | -0.4126 to -0.08905 | Yes          | ***     | 0.0007           |
| RIF 10 vs. LCTA 3368 30             | -0.3010    | -0.4628 to -0.1392  | Yes          | ****    | <0.0001          |
| RIF 10 vs. LCTA 3368 100            | -0.2463    | -0.4081 to -0.08452 | Yes          | ***     | 0.0009           |
| RIF 10 vs. LCTA 3368 100 (I.P)      | -0.2194    | -0.3812 to -0.05765 | Yes          | **      | 0.0037           |
| RIF 10 vs. LCTA 3368 200            | -0.2899    | -0.4517 to -0.1281  | Yes          | ****    | <0.0001          |

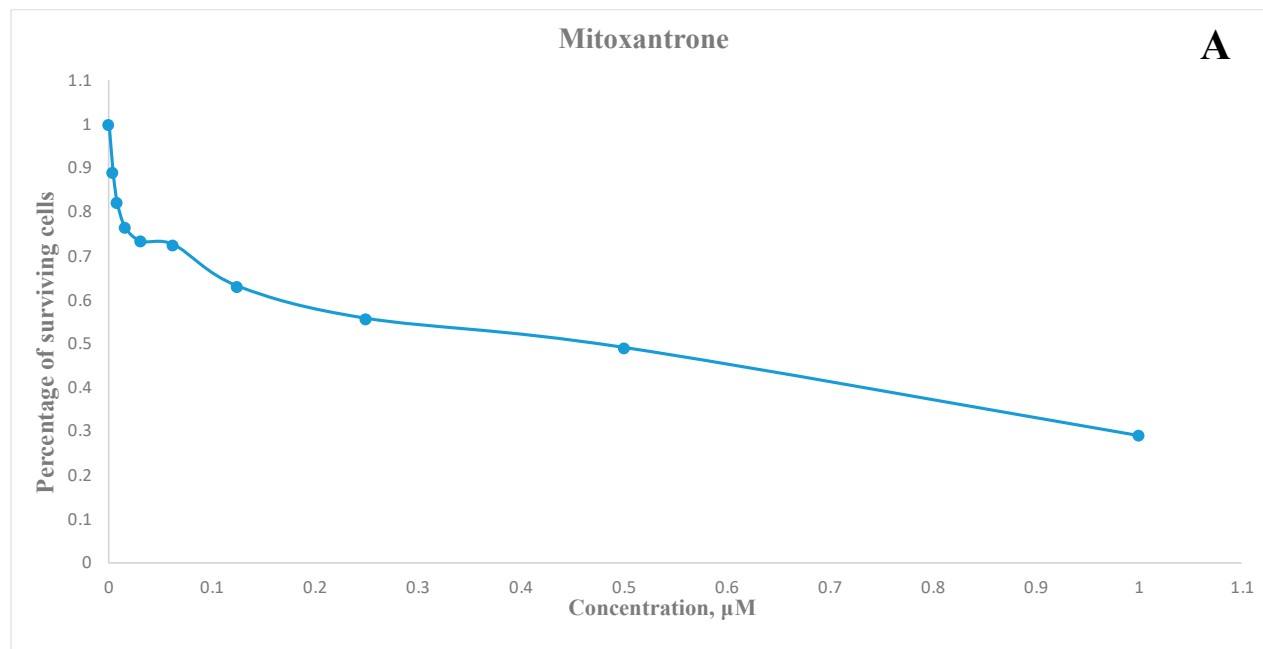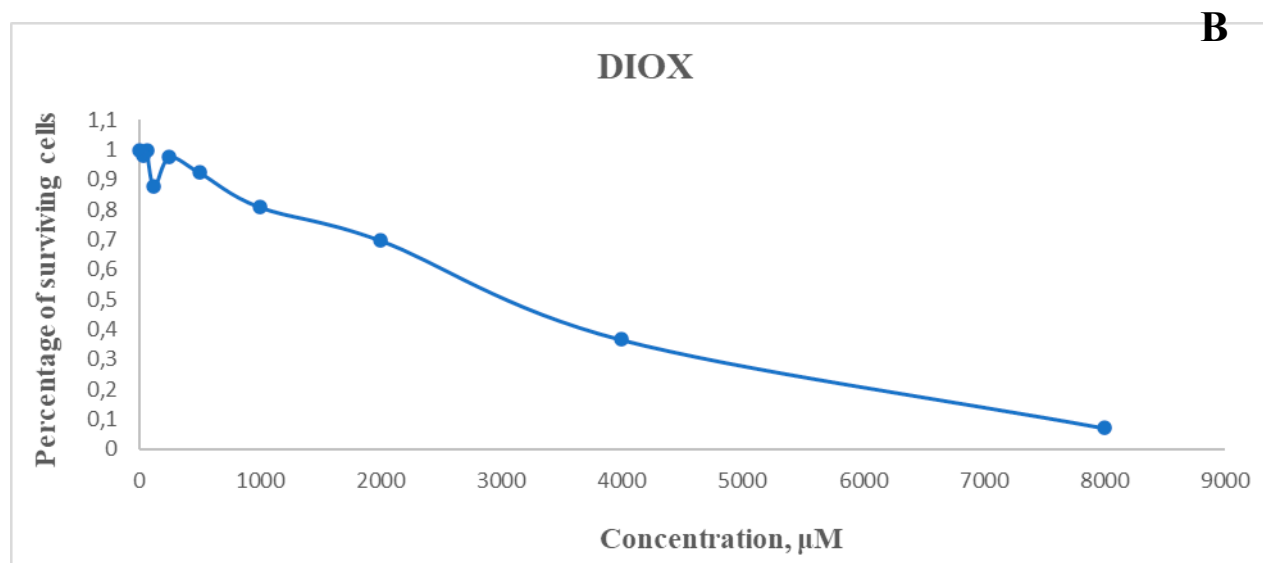

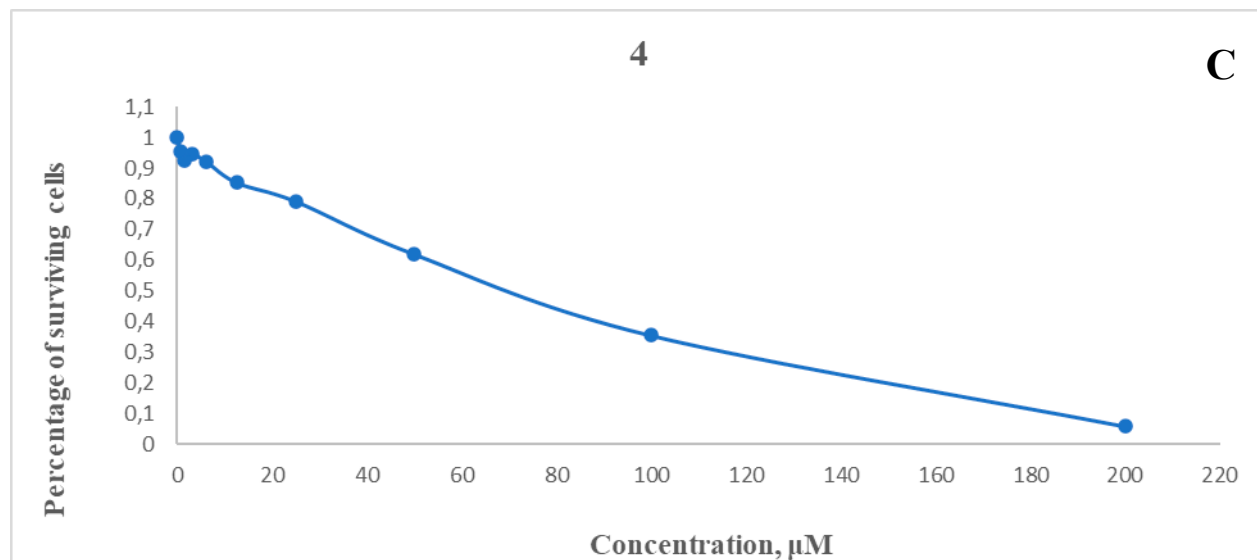

**Figure S40.** Results of MTT test of compounds on human fibroblasts. (A) Mitoxantrone was used as control. (B) Dioxidine (C) Tested 4.
